# Supplementary material for: Au–cysteine modified macroporous adsorption resin: preparation and highly selective enrichment and identification of N-linked glycopeptides from the complex biological sample
Source: Royal Society of Chemistry journal article supplement (doi:10.1039/c6ra24236g), 2016-01-01
Supplement: c6ra24236g1.pdf [file c6ra24236g1.pdf]

## Supporting Information

### **Au-cysteine modified macroporous adsorption resin: preparation and highly selective enrichment and identification of N-linked glycopeptides from the complex biological sample**

Xudong Sun <sup>a</sup>, Jing Dong<sup>b</sup>, Jinan Li <sup>b</sup>, Mingliang Ye<sup>b</sup>, Junjie Ou <sup>b</sup>, Lingyi Zhang <sup>a</sup>,

Weibing Zhang <sup>a\*</sup>

<sup>a</sup> Shanghai Key Laboratory of Functional Materials Chemistry, School of Chemistry & Molecular Engineering, East China University of Science and Technology, Shanghai 200237, China.

<sup>b</sup> CAS Key Laboratory of Separation Science for Analytical Chemistry, National Chromatographic R & A Center, Dalian Institute of Chemical Physics, Chinese Academy of Sciences (CAS), Dalian 116023, China

\* Corresponding authors:

Prof Weibing Zhang

Phone: +86-021-64233161; Fax: +86-021-64252145;

Address: No. 130 Meilong Road, Shanghai, China;

Email:

[weibingzhang@eust.edu.cn](mailto:weibingzhang@eust.edu.cn).

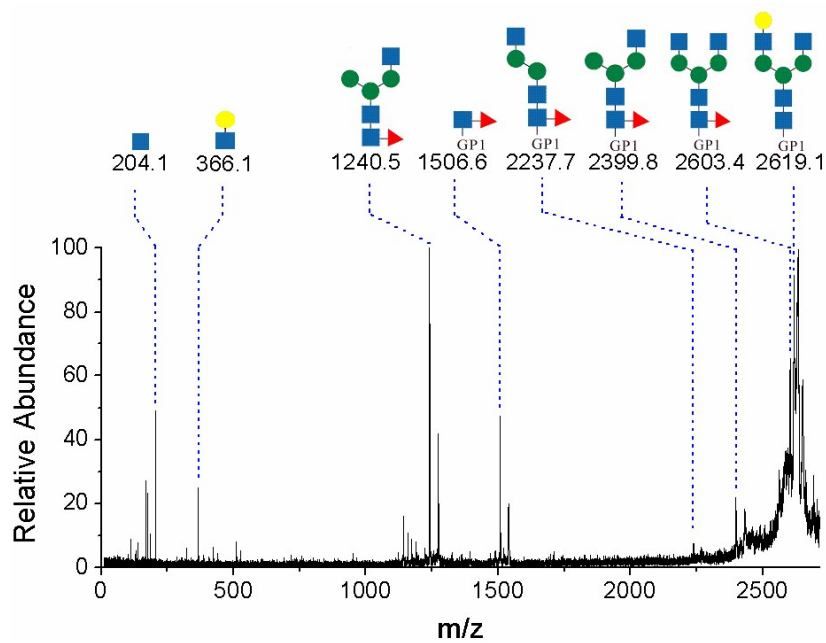

**Fig. S1.** MALDI-TOF MS/MS spectrum of the glycopeptide with  $m/z = 2763.48$  from Human IgG tryptic digest after enrichment by MAR/Au-Cys packed HILIC-SPE tip.

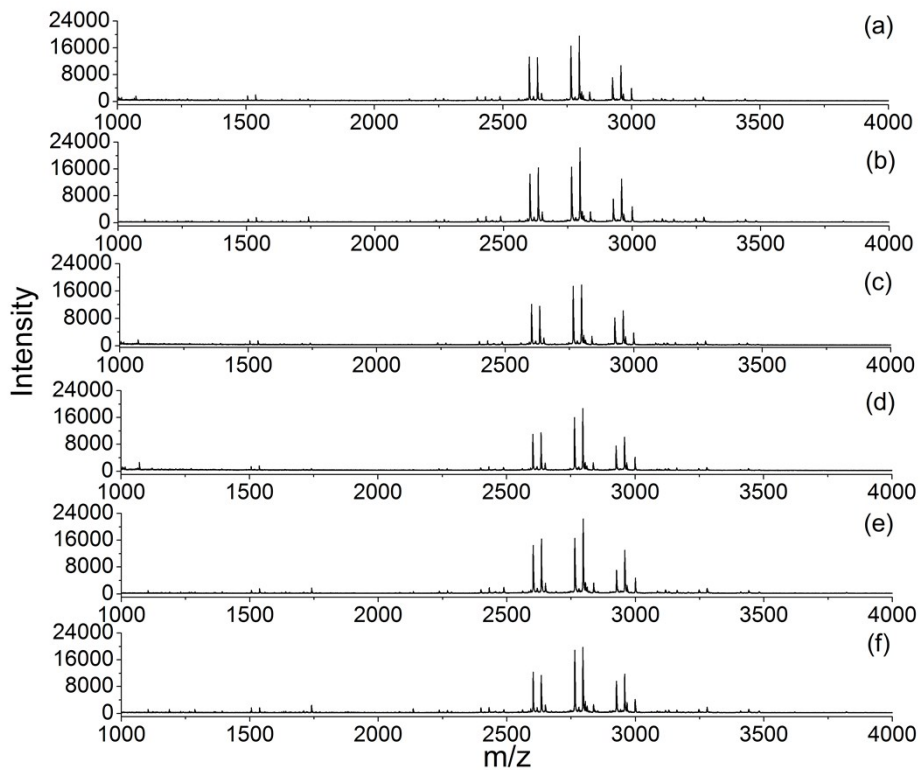

**Fig. S2.** MALDI-TOF MS spectrum of the glycopeptides from Human IgG tryptic digest (0.5 pmol) after enrichment by MAR/Au-Cys packed HILIC-SPE tip for six times continuously.

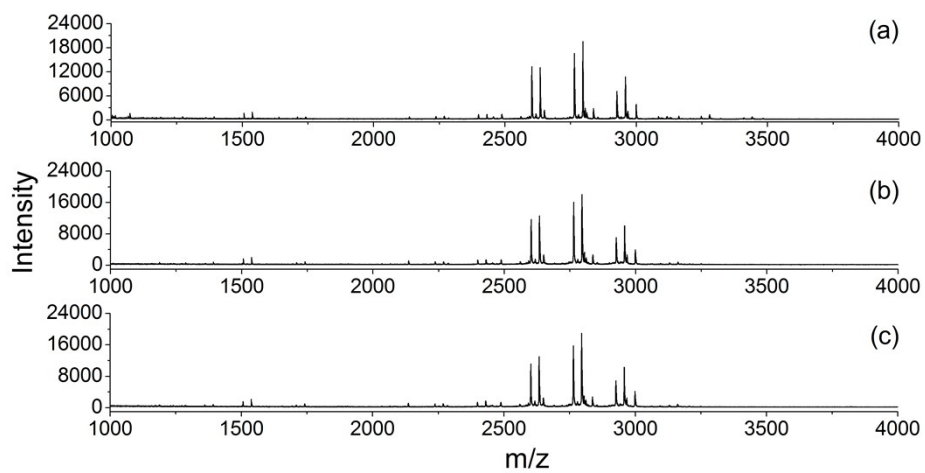

**Fig. S3.** Bath to bath reproducibility of MAR/Au-Cys packed HILIC-SPE tip in the selective enrichment of glycopeptide from tryptic digest of human IgG (0.5 pmol)

**Table S1** Molecular masses and proposed oligosaccharide compositions of the N-linked glycopeptides from human IgG tryptic digest after enrichment by MAR/Au-Cys packed HILIC-SPE tip.

| No. | m/z     | Glycan composition            | Amino acid sequence |
|-----|---------|-------------------------------|---------------------|
| I1  | 2398.69 | [Hex]3[HexNAc]3[Fuc]1         | EEQFN*STFR          |
| I2  | 2430.66 | [Hex]3[HexNAc]3[Fuc]1         | EEQYN*STYR          |
| I3  | 2455.70 | [Hex]3[HexNAc]4               | EEQFN*STFR          |
| I4  | 2487.68 | [Hex]3[HexNAc]4               | EEQYN*STYR          |
| I5  | 2560.75 | [Hex]4[HexNAc]3[Fuc]1         | EEQFN*STFR          |
| I6  | 2592.72 | [Hex]4[HexNAc]3[Fuc]1         | EEQYN*STYR          |
| I7  | 2601.76 | [Hex]3[HexNAc]4[Fuc]1         | EEQFN*STFR          |
| I8  | 2617.74 | [Hex]4[HexNAc]4               | EEQFN*STFR          |
| I9  | 2633.74 | [Hex]3[HexNAc]4[Fuc]1         | EEQYN*STYR          |
| I10 | 2649.74 | [Hex]4[HexNAc]4               | EEQYN*STYR          |
| I11 | 2763.80 | [Hex]4[HexNAc]4[Fuc]1         | EEQFN*STFR          |
| I12 | 2780.78 | [Hex]5[HexNAc]4               | EEQFN*STFR          |
| I13 | 2795.77 | [Hex]4[HexNAc]4[Fuc]1         | EEQYN*STYR          |
| I14 | 2804.81 | [Hex]3[HexNAc]5[Fuc]1         | EEQFN*STFR          |
| I15 | 2811.77 | [Hex]5[HexNAc]4               | EEQYN*STYR          |
| I16 | 2818.75 | [Hex]4HexNAc]5                | EEQFN*STFR          |
| I17 | 2836.79 | [Hex]3[HexNAc]5[Fuc]1         | EEQYN*STYR          |
| I18 | 2852.75 | [Hex]4[HexNAc]5               | EEQYN*STYR          |
| I19 | 2925.84 | [Hex]5[HexNAc]4[Fuc]1         | EEQFN*STFR          |
| I20 | 2957.80 | [Hex]5[HexNAc]4[Fuc]1         | EEQYN*STYR          |
| I21 | 2966.84 | [Hex]4[HexNAc]5[Fuc]1         | EEQFN*STFR          |
| I22 | 2998.83 | [Hex]4[HexNAc]5[Fuc]1         | EEQYN*STYR          |
| I23 | 3083.94 | [Hex]4[HexNAc]4[Fuc]1[NeuAc]1 | EEQYN*STYR          |
| I24 | 3128.89 | [Hex]5[HexNAc]5[Fuc]1         | EEQFN*STFR          |
| I25 | 3160.85 | [Hex]5[HexNAc]5[Fuc]1         | EEQYN*STYR          |
| I26 | 3246.04 | [Hex]5[HexNAc]4[Fuc]1[NeuAc]1 | EEQYN*STYR          |

HexNAc=N-acetylglucosamine, Hex=mannose, Fuc=fructose, NeuAc=sialic

**Table S2** The signal to noise ratios (S/N) of the six maximal glycopeptides from human IgG tryptic digest by direct analysis and analysis after enrichment by MAR/Au-Cys packed HILIC-SPE tip.

| No. | m/z    | Direct | MAR/Au-Cys |     |
|-----|--------|--------|------------|-----|
|     |        | S/N    | S/N        | EF  |
| I7  | 2601.7 | 181    | 1157       | 6.4 |
| I9  | 2633.7 | 167    | 1082       | 6.5 |
| I11 | 2763.8 | 173    | 1215       | 7.0 |
| I13 | 2795.7 | 263    | 1460       | 5.6 |
| I19 | 2925.8 | 64     | 548        | 8.5 |
| I20 | 2957.8 | 109    | 841        | 7.7 |

**Table S3** Molecular masses and proposed oligosaccharide compositions of the N-linked glycopeptides from HRP tryptic digest after enrichment by MAR/Au-Cys packed HILIC-SPE tip.

| No. | m/z     | Glycan composite            | Amino acid sequence         |
|-----|---------|-----------------------------|-----------------------------|
| H1  | 1842.57 | [Hex]3[HexNAc]2[Fuc]1[Xyl]1 | NVGLN*R                     |
| H2  | 2394.81 | [Hex]3[HexNAc]2[Fuc]1[Xyl]1 | LYN*FSNTGLPD                |
| H3  | 2544.78 | [Hex]3[HexNAc]2[Fuc]1[Xyl]1 | SSPN*ATDTIPLVR              |
| H4  | 3145.11 | [Hex]3[HexNAc]2[Fuc]1[Xyl]1 | GLCP LNGN*LSALVDFDLR. Oxide |
| H5  | 3671.31 | [Hex]3[HexNAc]2[Fuc]1[Xyl]1 | GLIQSDQELFSSPN*ATDTI PLVR   |
| H6  | 4983.75 | [Hex]3[HexNAc]2[Fuc]1[Xyl]1 | LYNFSNTGLPDPTLN*TT YLQTLR   |
|     |         | [Hex]3[HexNAc]2[Fuc]1[Xyl]1 |                             |

**Table S4** N-glycosylation sites identified from mouse liver proteins by using MAR/Au-Cys packed HILIC-SPE tip. (N\* indicated the N-linked glycosylation sites)

| No. | Protein | Peptide Sequence                        | Charge | Ions-score |
|-----|---------|-----------------------------------------|--------|------------|
| 1   | A0JNU1  | R.CWVPILDN*DTASDN*GSR.I                 | 2      | 40.13      |
| 2   | A2A5K4  | K.VSN*VSCEASVSK.M                       | 2      | 47.73      |
| 3   | A2A7A7  | R.NIN*SSCRPHPGAWLR.V                    | 3      | 24.33      |
| 4   | A2AAA9  | R.VTPVCN*ASLPAQR.W                      | 2      | 49.7       |
| 5   | A2ACH6  | R.N*VTVNILNDQTK.V                       | 2      | 46.74      |
| 6   | A2AFL5  | R.QVVEN*MTR.T                           | 2      | 31.99      |
|     |         | R.GVFITN*ETGQPLIGK.V                    | 2      | 64.85      |
| 7   | A2AFY7  | R.VN*LSAPLLPK.E                         | 2      | 30.23      |
| 8   | A2AKI5  | K.AN*TTQPGIVEGGQVLK.C                   | 2      | 52.9       |
|     |         | R.TAADATGLQPILNQFTPAN*VSR.Q             | 2      | 70.58      |
| 9   | A2AL78  | K.GGGGN*SSSSGSGSGSGSGSPSTGSSGSSSSPGAR.R | 2      | 101.99     |
| 10  | A2AL85  | K.VYEEVLN*VTPNDGFAK.V                   | 2      | 48.99      |
| 11  | A2AMH3  | R.CAPVN*ISCYAK.F                        | 2      | 25.83      |
| 12  | A2AMQ5  | R.CFVCPVEYN*N*DTNSFTVDCEPSDLFR.L        | 3      | 26.37      |
| 13  | A2APL5  | K.AVISM#LN*ETMNEAPEETK.I                | 2      | 23.06      |
|     |         | K.AVISMLN*ETMN*EAPEETK.I                | 2      | 20.72      |
|     |         | K.AVISMLN*ETMNEAPEETK.I                 | 2      | 42.98      |
| 14  | A2AQ53  | R.N*CTDIDECR.I                          | 2      | 37.6       |
|     |         | R.VLPFN*VTDYCYQLVR.Y                    | 2      | 85.07      |
|     |         | K.AWGTPCELCPNVN*TSEYK.I                 | 2      | 100.58     |
| 15  | A2AQJ5  | R.LFQN*CSELYK.A                         | 2      | 38.7       |
| 16  | A2AS37  | K.LEIVPIHYDN*DSLQVQTDK.S                | 2      | 36.43      |
| 17  | A2ATU0  | R.EDGDYSPN*GSAQPGDK.V                   | 2      | 57.97      |

|    |        |                                           |   |        |
|----|--------|-------------------------------------------|---|--------|
| 18 | A2AW86 | K.LAN*ISGEEQK.W                           | 2 | 30.37  |
| 19 | A2AWF8 | R.GPDGTEGLSSTVN*GSTDPSAVTDIR.V            | 2 | 31.72  |
|    |        | K.TN*STQVSDVR.A                           | 2 | 74.71  |
| 20 | A2BDV6 | K.LGIYADVGN*K.T                           | 2 | 36.63  |
| 21 | A6H584 | K.SN*DSVLEPANR.L                          | 2 | 56.43  |
|    |        | R.RFN*ETR.D                               | 2 | 33.96  |
|    |        | R.DLQNFLEN*VTSSVDVK.D                     | 2 | 41.8   |
|    |        | R.SSAN*QSEFQQIQK.L                        | 2 | 77.23  |
|    |        | R.YQEIIIESSLN*KTQWK.S                     | 3 | 26.2   |
| 22 | A6H6E2 | K.NFN*DSLHLSQAIR.N                        | 3 | 36.27  |
|    |        | K.FN*TTSINVGSSYFPEHGYFR.A                 | 3 | 50.81  |
| 23 | A6X935 | R.ISASGAELEALEAQVLN*LSLK.Y                | 2 | 104.47 |
| 24 | B1AR34 | R.QNFSN*LTVSTEDQVK.A                      | 2 | 53.03  |
|    |        | R.QN*FSNLTVSTEDQVK.A                      | 2 | 38.67  |
|    |        | R.QN*FSN*LTVSTEDQVK.A                     | 2 | 93.45  |
|    |        | R.QN*FSN*LTVSTEDQVK.A                     | 2 | 40.41  |
|    |        | R.QN*FSN*LTVSTEDQVK.A                     | 2 | 23.62  |
| 25 | B1AS81 | R.CIIVGNGGVLAN*K.S                        | 2 | 40.26  |
| 26 | B1B0C7 | K.IRDQELEDNVHISPN*GSIIITIVGTRPSNHGAYR.C   | 5 | 22.62  |
|    |        | K.GVN*VTM#PSQPGVPLSSTQLQIDPALQEFQLVDLSR.R | 3 | 23.53  |
|    |        | K.LTVPSSQN*SSFR.L                         | 2 | 37.89  |
|    |        | R.CDGDFDCEDRTDEAN*CSVK.Q                  | 2 | 44.79  |
|    |        | R.SLTQGSLIVGNLAPVN*GTSQGK.F               | 2 | 66.91  |
|    |        | R.ALVN*FTR.S                              | 2 | 40.96  |
|    |        | R.TDEAN*CSVK.Q                            | 2 | 48.7   |
| 27 | B2RT89 | R.CWAPILDN*DTASDN*GSR.I                   | 2 | 64.64  |

---

|    |        |                                          |   |       |
|----|--------|------------------------------------------|---|-------|
| 28 | B2RXS4 | R.CVYEALCSN*VTSECPPPVITR.I               | 2 | 50.1  |
|    |        | K.SCVAITDAFPQN*MSR.R                     | 2 | 79.21 |
|    |        | R.AMSN*ISVR.L                            | 2 | 59.82 |
|    |        | R.TEAGVFEYVADPTFEN*FTGGVKK.Q             | 3 | 53.94 |
|    |        | K.SCVAITDAFPQN*M#SR.R                    | 2 | 62.25 |
|    |        | R.TEAGVFEYVADPTFEN*FTGGVK.K              | 2 | 41.46 |
|    |        | R.QGPQAGGTTLTIN*GTHLDTGSK.E              | 3 | 37.95 |
|    |        | K.VVFLSPAVPEEPEAYN*LTVLIR.M              | 3 | 24.02 |
|    |        | K.LSHDGN*ETLPLHLYVK.S                    | 4 | 34.3  |
|    |        | R.AM#SN*ISVR.L                           | 2 | 49.01 |
| 29 | B5THE2 | R.VILILDPAISGN*ETEPYPAFTR.G              | 3 | 28.9  |
|    |        | R.IDCYPDEHGASEAN*CSAR.G                  | 3 | 34.07 |
|    |        | R.RQDPVSWN*K.T                           | 2 | 32.88 |
|    |        | R.FSVN*QTLLTHEK.F                        | 2 | 62.46 |
|    |        | R.GCIWEASN*TTR.G                         | 2 | 50.85 |
| 30 | B8JK39 | K.VLN*LTDNTYFK.L                         | 2 | 58.79 |
| 31 | D3YTM0 | R.LWLVPV*LTWADLEDK.D                     | 2 | 35.45 |
|    |        | R.LWLVPV*LTWADLEDKDGR.V                  | 2 | 76.63 |
| 32 | D3YTY9 | K.EGN*CSAQSGLAWQDCDFKDAEEAATGECTATVGKR.E | 3 | 55.65 |
|    |        | K.EGN*CSAQSGLAWQDCDFKDAEEAATGECTATVGK.R  | 3 | 77.66 |
|    |        | K.EGN*CSAQSGLAWQDCDFKDAEEAATGECTATVGK.R  | 3 | 20.39 |
|    |        | K.IAN*FSQSCTLYSGDDLVEALPKPCPGCPR.D       | 3 | 71.2  |
|    |        | K.EGN*CSAQSGLAWQDCDFKDAEEAATGECTATVGKR.E | 4 | 30.21 |
|    |        | K.EGN*CSAQSGLAWQDCDFKDAEEAATGECTATVGK.R  | 3 | 31.06 |
|    |        | K.IAN*FSQSCTLYSGDDLVEALPKPCPGCPR.D       | 3 | 80.83 |
|    |        | K.EGN*CSAQSGLAWQDCDFK.D                  | 2 | 69.82 |

---



|    |        |                                                       |   |       |
|----|--------|-------------------------------------------------------|---|-------|
| 33 | D3YU17 | R.VIYN*LTEK.G                                         | 2 | 35.51 |
| 34 | D3YU75 | R.TEGAIDDSLIGGN*ASAEGPEGEGTESTVVTGVDIVMN*HHLQETSFTK.E | 4 | 57.34 |
|    |        | R.TEGAIDDSLIGGN*ASAEGPEGEGTESTVVTGVDIVMN*HHLQETSFTK.E | 4 | 25.22 |
| 35 | D3YVI3 | K.FLWSEPQN*CSATK.S                                    | 2 | 36.21 |
| 36 | D3YVV1 | R.DDLHPTLPAGQYFLN*ITYNYPVHSFDGR.K                     | 4 | 29.86 |
| 37 | D3YW52 | K.VN*LSFPSAQLPASDTHLK.V                               | 2 | 51.66 |
|    |        | R.IN*VSYTGERPSSNMVIVDVK.M                             | 3 | 57.57 |
|    |        | K.SLGEVN*FTATAEALQSPELGNK.L                           | 2 | 74.41 |
|    |        | K.CFANKVN*LSFPSAQLPASDTHLK.V                          | 3 | 51.01 |
|    |        | K.LTN*QTLGFSAFEQDIPVK.N                               | 3 | 24.75 |
|    |        | K.SLGEVN*FTATAEALQSPELGNK.L                           | 2 | 36.98 |
|    |        | K.SLGEVN*FTATAEALQSPELGN*K.L                          | 2 | 28.86 |
|    |        | R.IN*VSYTGERPSSNM#VIVDVK.M                            | 3 | 43.04 |
| 38 | D3YWH4 | R.IIFAN*VSVR.D                                        | 2 | 33.74 |
| 39 | D3YY36 | K.SCHTAVGTSEGWNVPM#GLIYN*QTGSCK.F                     | 3 | 34.7  |
|    |        | K.DLLFSDDTECLSNLQN*K.T                                | 2 | 81.19 |
|    |        | K.SCHTAVGTSEGWNVPMGLIYN*QTGSCK.F                      | 3 | 59.14 |
|    |        | K.DLLFSDDTECLSN*LQN*K.T                               | 2 | 25.06 |
| 40 | D3YYT0 | K.RN*WTINR.L                                          | 2 | 41.23 |
|    |        | K.FLEAGIYEVPIIITDSGNPPKSN*ISILR.V                     | 3 | 43.86 |
|    |        | K.SN*ISILR.V                                          | 2 | 43.86 |
| 41 | D3Z0H8 | R.LFSICQFVDDGLDLN*R.T                                 | 2 | 42.3  |
|    |        | R.LFSICQFVDDGLDLN*R.T                                 | 2 | 37.97 |
| 42 | D3Z0Y0 | R.N*STIQAANLAGLK.I                                    | 2 | 81.91 |
| 43 | D3Z1X2 | K.AFYN*GTWYR.R                                        | 2 | 47.81 |
| 44 | D3Z2V4 | R.ESGIQN*VSTCR.F                                      | 2 | 64.84 |

---

|    |        |                                          |   |        |
|----|--------|------------------------------------------|---|--------|
|    |        | R.FTAPDTLFAN*GSVYPPNEGFCPCR.E            | 2 | 88.44  |
|    |        | K.EHSLFLDIHPVTGIPMN*CSVK.M               | 3 | 41.21  |
|    |        | K.LTYN*ESR.V                             | 2 | 43.77  |
|    |        | K.EHSLFLDIHPVTGIPM#N*CSVK.M              | 3 | 27.93  |
|    |        | R.FTAPDTLFAN*GSVYPPN*EGFCPCR.E           | 2 | 38.4   |
| 45 | D3Z396 | K.AM#DN*VTVR.Q                           | 2 | 42.45  |
| 46 | D3Z598 | R.N*ATSVDSGAPGGAAPGGPGFR.A               | 2 | 61.04  |
| 47 | D3Z5U5 | K.AAEN*FTLLVK.N                          | 2 | 48.59  |
|    |        | K.GVAVTN*TSQLGFR.I                       | 2 | 36.46  |
|    |        | K.TSICSDAN*CTLGSSDTHSSGIGTGR.C           | 3 | 38.94  |
| 48 | D3Z665 | R.GSEVEDEDLELFN*TSVQLRPPSTAPGPETAAFIER.L | 3 | 98.79  |
|    |        | R.GSEVEDEDLELFN*TSVQLRPPSTAPGPETAAFIER.L | 3 | 108.49 |
| 49 | D3Z6W7 | R.N*CSLEDDSVR.S                          | 2 | 60.08  |
| 50 | D6RFS3 | K.ETLVTLFDN*R.T                          | 2 | 58.41  |
| 51 | D6RGQ0 | K.LTEFTHN*STM#DYK.C                      | 2 | 52.95  |
|    |        | K.IQCVDGN*WTTLPVCIEEER.T                 | 2 | 67.06  |
|    |        | R.CQSPYQMN*GSDTVTCVNSR.W                 | 2 | 28.22  |
|    |        | K.WDPEPN*CTSK.T                          | 2 | 23.2   |
|    |        | K.LTEFTHN*STMDYK.C                       | 2 | 62.01  |
|    |        | K.DNSCVDPPHVPN*ATIVTR.T                  | 2 | 55.08  |
| 52 | D6RH54 | R.LATIAN*FSELGLEPGR.D                    | 2 | 30.22  |
|    |        | R.CLVPHTVN*LSSAWR.N                      | 3 | 44.86  |
|    |        | R.N*HSIPLETK.D                           | 2 | 23.24  |
| 53 | E0CXA0 | K.N*STPSEPDSGQPPAEEEEGEEEAKEEAQAQGV.R    | 3 | 67.19  |
| 54 | E0CXC7 | R.TGELFTFN*TAAQPQYFK.Y                   | 2 | 30.65  |
| 55 | E0CXJ2 | R.TDCDSSTASLCSFPVAN*VSLAK.S              | 2 | 110.2  |

---

|    |        |                                      |   |        |
|----|--------|--------------------------------------|---|--------|
| 56 | E0CY16 | K.DVTVIEGEVATISCQVN*KSDDSVIQLLNP.R.Q | 4 | 28.42  |
|    |        | R.FQLLN*FSSSELK.V                    | 2 | 77.99  |
|    |        | K.VSLTN*VSISSDEGR.Y                  | 2 | 113.04 |
| 57 | E0CY63 | R.SPIQEN*SSDSNK.I                    | 2 | 73.91  |
|    |        | R.YN*GSLGLWR.R                       | 2 | 40.94  |
| 58 | E0CYM8 | R.GIAN*LSNFIR.V                      | 2 | 57.89  |
| 59 | E0CYN0 | R.SPGAQDN*VSVSQGM#R.A                | 2 | 83.52  |
|    |        | R.SPGAQDN*VSVSQGMR.A                 | 2 | 75.42  |
| 60 | E0CYQ2 | K.ENPGFDFSGAEISGN*YTK.G              | 2 | 27.35  |
| 61 | E9PUH5 | R.N*YTADYDKTLIFNK.I                  | 2 | 27.95  |
|    |        | R.N*YTADYDK.T                        | 2 | 34.78  |
| 62 | E9PUM5 | K.NN*STWFK.L                         | 2 | 29.06  |
| 63 | E9PV38 | K.LN*LTEEEK.L                        | 2 | 51.11  |
|    |        | R.DGTSQPAICPQN*VTMNM#EGLK.E          | 3 | 34.97  |
|    |        | R.DGTSQPAICPQN*VTM#NMEGLK.E          | 2 | 38.11  |
|    |        | R.DGTSQPAICPQN*VTMNMEGLK.E           | 2 | 44.51  |
| 64 | E9PVH9 | K.YFTN*RLDVSQN*VSSDTDQSCESTK.A       | 3 | 21.66  |
|    |        | R.LDVSQN*VSSDTDQSCESTK.A             | 2 | 28.3   |
|    |        | K.YFTNRLDVSQN*VSSDTDQSCESTK.A        | 3 | 21.93  |
|    |        | R.LDVSQN*VSSDTDQSCESTK.A             | 2 | 105.91 |
| 65 | E9PWK4 | R.EN*ISDPTSPLR.R                     | 2 | 46.58  |
| 66 | E9PXU2 | R.N*LSGPCVPYVDAEQK.N                 | 2 | 46.72  |
|    |        | K.CQEAIN*ATCK.G                      | 2 | 45.49  |
|    |        | R.N*TSWDNAGFK.G                      | 2 | 28.49  |
| 67 | E9PXX8 | K.NQN*ITAR.Q                         | 2 | 34.21  |
| 68 | E9Q0W2 | R.YKYETTISPTSNLSSN*SFLCIEN*R.T       | 3 | 29.71  |

|    |        |                                             |   |       |
|----|--------|---------------------------------------------|---|-------|
|    |        | R.YKYETTISPTSN*LSSN*SFLCIEN*R.T             | 3 | 25.25 |
|    |        | R.YKYETTISPTSNLSSNSFLCIEN*R.T               | 3 | 38.45 |
|    |        | R.YKYETTISPTSN*LSSNSFLCIEN*R.T              | 3 | 65.98 |
| 69 | E9Q1Y3 | R.LPQQIHHYLN*ASDWER.Q                       | 4 | 38.75 |
|    |        | K.LTYESGFLN*YSK.F                           | 2 | 66.07 |
| 70 | E9Q415 | K.AN*HSHSGDYCK.G                            | 3 | 46.16 |
|    |        | K.ATVN*DSGEYR.C                             | 2 | 66.49 |
|    |        | R.YHHYSSN*FSIPK.A                           | 3 | 52.03 |
| 71 | E9Q4G8 | R.DSYPDGN*ITWYR.N                           | 2 | 50.68 |
|    |        | R.TVNSLN*VSAISPEHDEADDISDENREK.V            | 3 | 79    |
|    |        | R.LLSEN*YTLSIANAK.I                         | 2 | 71.78 |
|    |        | R.TVNSLN*VSAISPEHDEADDISDEN*REK.V           | 3 | 94.13 |
|    |        | K.IISPEEN*VTLTCTAENQLER.T                   | 2 | 80.67 |
|    |        | R.TVNSLN*VSAISPEHDEADDISDENR.E              | 3 | 62.21 |
| 72 | E9Q631 | R.RASLKQN*M#SSALAYMLLVLSISLLNGQSPPGKPEIHK.C | 4 | 21.29 |
| 73 | E9Q638 | R.NFQCVN*ASVLNYDCDIQK.C                     | 2 | 53.4  |
| 74 | E9Q6M5 | R.CWVHIIDN*DTNSNNN*SGILSQDDLLR.I            | 3 | 22.26 |
|    |        | R.CWVHIIDN*DTNSNN*NSGILSQDDLLR.I            | 3 | 30.8  |
|    |        | R.CWVHIIDN*DTN*SNN*N*SGILSQDDLLR.I          | 3 | 21.13 |
| 75 | E9Q706 | R.NPCN*SSVLQDGR.R                           | 2 | 52.29 |
| 76 | E9QJS7 | R.DFNPATVN*YTIQK.L                          | 2 | 62.39 |
| 77 | E9QN70 | R.VNASTTDPN*STVEQSALTR.D                    | 2 | 71.31 |
|    |        | K.LTDTASQSN*STAGELGALQAEAESLTK.T            | 3 | 60.95 |
|    |        | R.VN*ASTTDPNSTVEQSALTR.D                    | 2 | 82.41 |
| 78 | E9QPX1 | R.DGQQN*ISLLYTEPGASQTQTGASFR.L              | 2 | 21.38 |
|    |        | R.DGQQN*ISLLYTEPGASQTQTGASFR.L              | 3 | 32.81 |

---

|    |        |                             |   |       |
|----|--------|-----------------------------|---|-------|
| 79 | F2Z425 | R.LIN*LTFLDLTR.-            | 2 | 63.36 |
| 80 | F6QD87 | R.FSTELGYN*GTR.H            | 2 | 36.8  |
| 81 | F6RN19 | K.VFKPQSGADALN*DSQDFPFPAK.V | 3 | 52.39 |
|    |        | K.VFKPQSGADALN*DSQDFPFPAK.V | 3 | 38.49 |
| 82 | F6TQW2 | R.EDYN*STLR.V               | 2 | 36.24 |
| 83 | F6VSK8 | K.YQTLN*CSVNVR.C            | 2 | 48.02 |
| 84 | F6WMD1 | R.VIDLWDLAQSAN*FTEKELESFR.E | 3 | 44.29 |
|    |        | R.VIDLWDLAQSAN*FTEK.E       | 2 | 95.08 |
| 85 | F6X479 | K.CDISN*STEAGQK.L           | 2 | 30.26 |
| 86 | F6Y6L6 | K.YYHGELSYLN*VTR.K          | 3 | 37.33 |
|    |        | K.YYHGELSYLN*VTRK.A         | 4 | 27.96 |
| 87 | F6ZXJ7 | K.GDEKEN*ITAEALDLSLK.Y      | 3 | 50.38 |
| 88 | F7BWT7 | R.N*TTDVVNTMCGYK.T          | 2 | 61.97 |
| 89 | F7CIP8 | R.KMSN*ITFR.N               | 2 | 49.76 |
|    |        | K.M#SN*ITFR.N               | 2 | 50.82 |
|    |        | R.KM#SN*ITFR.N              | 2 | 35.74 |
|    |        | K.MSN*ITFR.N                | 2 | 53.24 |
|    |        | R.LLN*QTLR.E                | 2 | 40.34 |
| 90 | F8VQJ3 | R.CDQCEENYFYN*R.S           | 2 | 60.74 |
|    |        | R.TLAGEN*QTALEIEELNR.K      | 2 | 55.51 |
|    |        | R.VNDN*KTAAEEALR.R          | 2 | 83.75 |
|    |        | R.VN*SSLHSQISR.L            | 2 | 56.93 |
|    |        | R.RIPAIN*R.T                | 2 | 36.39 |
|    |        | K.LLNN*LTSIK.I              | 2 | 34.07 |
| 91 | F8WGE3 | K.ILASPNEEN*M#TELISM#R.F    | 2 | 56.04 |
|    |        | K.NYN*FTLACNTKR.L           | 2 | 31.76 |

---

---

|     |        |                               |   |        |
|-----|--------|-------------------------------|---|--------|
|     |        | K.ILASPNEEN*MTELISM#R.F       | 2 | 98.68  |
|     |        | K.ILASPNEEN*MTELISMR.F        | 2 | 84.51  |
|     |        | K.NYN*FTLACNTK.R              | 2 | 76.17  |
|     |        | K.ILASPNEEN*MTELISM#R.F       | 2 | 73.11  |
|     |        | K.N*YN*FTLACNTK.R             | 2 | 47.46  |
|     |        | K.ILASPNEEN*MTELISMR.F        | 2 | 77.14  |
| 92  | F8WH23 | K.GTCEQGPSIVTPPKDIWN*VTGAK.V  | 3 | 32.64  |
| 93  | F8WHM5 | R.GN*ITEYQCHQYITK.M           | 2 | 48.34  |
|     |        | K.LN*LTTDPK.F                 | 2 | 42.45  |
|     |        | R.N*DTLQEAK.E                 | 2 | 37.58  |
| 94  | F8WI14 | R.NVALVAGDTGN*ATGLGEQGPTR.G   | 2 | 87.78  |
| 95  | F8WIJ0 | K.TVVVDN*ETVATR.L             | 2 | 39.89  |
| 96  | F8WJ05 | K.N*LTNMSK.N                  | 2 | 24.73  |
|     |        | R.AN*LSSQVLK.M                | 2 | 54.22  |
| 97  | G3UWC2 | K.NYAASIFN*ISK.K              | 2 | 44.88  |
| 98  | G3UWE8 | R.TAGAN*GTSGFFCVDEGGLPLAQR.L  | 2 | 117.14 |
| 99  | G3UWI7 | R.ETNVGN*QTVVR.V              | 2 | 32.35  |
| 100 | G3UWR0 | K.N*ATYGYVLDDPDPDDGFNYK.Q     | 2 | 58.84  |
| 101 | G3UWY8 | R.QYYN*SSGTQSQR.A             | 2 | 32.18  |
| 102 | G3UYI3 | R.N*VTYGTYLDDPDPDDGFNYK.Q     | 2 | 82.66  |
| 103 | G3X8Q5 | K.EYEGAVYPD*TTDFQR.A          | 2 | 60.67  |
| 104 | G3X8T3 | K.VRLDPPCTN*TTAPSNYLNNPYVR.K  | 3 | 41.38  |
|     |        | K.M#YVTN*DTEVAENNYEALKDFFR.L  | 3 | 52.38  |
|     |        | K.MYVTN*DTEVAENNYEALKDFFR.L   | 3 | 67.54  |
|     |        | R.LDPPCTN*TTAPSNYLNNPYVR.K    | 2 | 67.56  |
|     |        | K.VRLDPPCTN*TTAPSN*YLNNPYVR.K | 3 | 38.66  |

---

---

|     |        |                                       |   |       |
|-----|--------|---------------------------------------|---|-------|
|     |        | K.MYVTN*DTEVAEN*N*YEALKDFFR.L         | 3 | 61.84 |
|     |        | K.M#YVTN*DTEVAENN*YEALKDFFR.L         | 3 | 26.29 |
| 105 | G3X8X6 | K.AN*TSLELLLEGVR.V                    | 2 | 53.9  |
| 106 | G3X924 | R.ADSLYSQVVGLSASQAN*LSK.Q             | 2 | 69.18 |
|     |        | K.QLN*ISLLVK.E                        | 2 | 26.57 |
| 107 | G3X973 | K.KGCADYCN*QTITK.R                    | 2 | 20.06 |
|     |        | K.CIN*CTR.K                           | 2 | 30.21 |
|     |        | K.GFFGPDCTQCPGGFSNPCYGKGN*CSDGVR.G    | 3 | 41.63 |
|     |        | K.GFFGPDCTQCPGGFSNPCYGKGN*CSDGVR.G    | 3 | 38.27 |
|     |        | R.WQIHN*ISGK.V                        | 2 | 34.17 |
|     |        | K.GCADYCN*QTITK.R                     | 2 | 43    |
|     |        | R.FCN*ESMGNCGSTGLAQPCHSDAHCVIQEGVAR.C | 4 | 32.16 |
|     |        | R.N*VTAAAESFGYK.I                     | 2 | 70.13 |
|     |        | K.GDGPFTVFPHADLISN*MSQDELAR.I         | 3 | 22.94 |
| 108 | G3X9D6 | K.TQN*GSLPAVTR.T                      | 2 | 49.81 |
| 109 | G3X9S2 | K.VYN*GSVPFEER.I                      | 2 | 58.22 |
| 110 | G5E897 | R.GVTNDLLSVQGNTGPSWIN*KTEK.A          | 3 | 26.6  |
|     |        | R.N*FTSSPPGQTQFK.V                    | 2 | 21.58 |
| 111 | G5E8Q8 | R.EN*VTCQDPIIGIDPGK.V                 | 2 | 52.53 |
| 112 | G5E8Z4 | R.GVSSSEN*FTSPVMEFWER.R               | 2 | 87.84 |
|     |        | R.GVSSSEN*FTSPVM#EFWER.R              | 2 | 59.61 |
| 113 | H3BIX4 | K.EN*GVFEEISN*SSGR.F                  | 2 | 22.93 |
|     |        | K.AN*ATIEVK.A                         | 2 | 49.49 |
|     |        | K.ENGVFEEISN*SSGR.F                   | 2 | 79.62 |
|     |        | R.KKENGVFEEISN*SSGR.F                 | 3 | 31.75 |
|     |        | R.KN*ASNMEYR.I                        | 2 | 27.91 |

---

---

|     |        |                                   |   |       |
|-----|--------|-----------------------------------|---|-------|
|     |        | R.KKEN*GVFEEISN*SSGR.F            | 3 | 28.98 |
|     |        | K.N*ASN#EYR.I                     | 2 | 29.9  |
| 114 | H3BJ97 | R.GRADECALPYLGATCYCDLFCN*R.T      | 3 | 63.92 |
| 115 | H3BKL5 | K.DGGSTTAGN*SSQVSDGAAVLLAR.R      | 2 | 44.16 |
| 116 | H3BL34 | K.N*TTSAAMVHCLR.Q                 | 2 | 46.15 |
|     |        | K.N*ATSYPPMCFQDPVTGQIVNDLLTN*R.K  | 2 | 33.31 |
|     |        | K.N*ATSYPPM#CFQDPVTGQIVNDLLTNRK.E | 3 | 25.48 |
|     |        | K.N*ATSYPPM#CFQDPVTGQIVNDLLTNR.K  | 3 | 35.82 |
|     |        | K.N*TTSAAM#VHCLR.Q                | 2 | 55.28 |
|     |        | K.N*ATSYPPMCFQDPVTGQIVNDLLTNR.K   | 2 | 34.09 |
|     |        | K.N*ATSYPPMCFQDPVTGQIVNDLLTNRK.E  | 3 | 27.95 |
|     |        | K.N*ATSYPPMCFQDPVTGQIVNDLLTNR.K   | 3 | 21.12 |
| 117 | H3BLE9 | K.EN*SSYQVINWR.L                  | 2 | 55.57 |
|     |        | R.KEN*SSYQVINWR.L                 | 2 | 88.96 |
| 118 | J3KMG3 | R.TGN*SSPASVER.E                  | 2 | 72.15 |
| 119 | J3KMS9 | K.EAGN*ITTDGYEILGK.L              | 2 | 50.19 |
| 120 | J3QJX3 | K.M#YSEGSDIVPQSN*ETALHYFK.K       | 3 | 51.55 |
|     |        | R.EATIVGEN*ETYPR.A                | 2 | 70.55 |
|     |        | K.MYSEGSDIVPQSN*ETALHYFK.K        | 3 | 44.66 |
| 121 | J3QMM7 | K.LSQALGN*ITVVQK.G                | 2 | 80.83 |
| 122 | J3QPG5 | K.TN*SSFIQGFVDHVKEDCDR.L          | 2 | 26.08 |
|     |        | K.TVVTEAGNLLKDN*ATQEEILHYLEK.T    | 3 | 46.32 |
|     |        | K.N*STKEEILAALEK.G                | 2 | 65.18 |
|     |        | K.TN*SSFIQGFVDHVK.E               | 2 | 71.53 |
|     |        | K.FSELIVN*N*ATEELLVK.G            | 2 | 25    |
|     |        | K.DN*ATQEEILHYLEK.T               | 2 | 69.43 |

---



---

|     |        |                                |   |       |
|-----|--------|--------------------------------|---|-------|
|     |        | K.FSELIVNN*ATEELLVK.G          | 2 | 57.05 |
|     |        | K.TN*SSFIQGFVDHVKEDCDR.L       | 3 | 56.88 |
|     |        | K.TVVTEAGNLLKDN*ATQEEILHYLEK.T | 3 | 84    |
| 123 | J3QQ16 | R.QLINALQIN*NTAVGHALVLPAR.R    | 3 | 63.13 |
|     |        | R.GPPGVN*GTQGFQGCPCQR.G        | 2 | 73.3  |
|     |        | R.ALN*GSALYTGSSLDFVR.N         | 2 | 87.45 |
|     |        | K.QINPPHTAN*SSLTSK.V           | 3 | 21.54 |
| 124 | K3W4R4 | K.VVDKGN*GSKPTSPEEVK.F         | 3 | 33.97 |
|     |        | R.SFMVN*WTQSPGK.V              | 2 | 49.88 |
|     |        | K.AIN*ASAN*ITSDGVEVLGR.M       | 2 | 67.32 |
|     |        | R.SFMVN*WTQSPGKVEK.Y           | 3 | 22.2  |
|     |        | K.AINASAN*ITSDGVEVLGR.M        | 2 | 37.81 |
| 125 | K4DI58 | K.MTQESALIFPFLN*K.S            | 2 | 30.38 |
| 126 | K4DI63 | K.VVTPEEYFN*VTLQ.-             | 2 | 43.33 |
|     |        | K.VN*KTEEDYAR.D                | 2 | 63.31 |
| 127 | L7N260 | R.TAQSYYN*QSK.G                | 2 | 43.11 |
| 128 | M0QWG8 | K.MN*ITSIAPLLEK.L              | 2 | 51.65 |
| 129 | O08530 | R.HYN*YTGK.L                   | 2 | 39.05 |
| 130 | O08603 | K.TM#TSGDPGETAN*ATEVKK.C       | 3 | 25.31 |
|     |        | R.CN*LTIKDPTPADPLWYEAK.C       | 3 | 26.96 |
|     |        | K.TMTSGDPGETAN*ATEVK.K         | 2 | 38.19 |
| 131 | O08692 | K.DCDFLEDGEERN*CTGK.F          | 2 | 55.49 |
| 132 | O08717 | K.LQLEFRPLDLN*STAAGLPR.L       | 3 | 51.28 |
| 133 | O08795 | K.YEQGTGCWQGPN*R.S             | 2 | 45.55 |
| 134 | O08966 | K.YEVDWNQSTLDCVDPLSSLAAN*R.S   | 3 | 50.81 |
|     |        | K.YEVDWN*QSTLDCVDPLSSLAAN*R.S  | 2 | 32.86 |

---

|     |        |                                    |   |        |
|-----|--------|------------------------------------|---|--------|
|     |        | K.YEVDWN*QSTLDCVDPLSSLAAN*R.S      | 2 | 94.18  |
|     |        | K.YEVDWNQSTLDCVDPLSSLAAN*R.S       | 3 | 44.74  |
| 135 | O09043 | K.ASSFRPN*GTK.F                    | 2 | 61.07  |
| 136 | O09159 | R.RDDYRPTWTLN*QTEPVAGNYYPVN*TR.I   | 3 | 38.62  |
|     |        | R.DDYRPTWTLN*QTEPVAGNYYPVNTR.I     | 3 | 50.11  |
|     |        | K.AN*LTWTVK.E                      | 2 | 53.33  |
|     |        | K.QN*FSFCR.E                       | 2 | 28.7   |
|     |        | R.ELN*ISICPVSQTSER.F               | 2 | 72.99  |
|     |        | R.RDDYRPTWTLN*QTEPVAGNYYPVNTR.I    | 4 | 28.44  |
| 137 | O35114 | K.TSLDWTTDTCNM#IN*GTDGDSFHPLISK.D  | 3 | 67.09  |
|     |        | K.TSLDWTTDTCN*M#IN*GTDGDSFHPLISK.D | 3 | 34.14  |
|     |        | R.TMVFPVMYLN*ESVLIDKETANQLK.S      | 3 | 23.31  |
|     |        | R.NGTN*DGEYVFLTGEDNYLN*FSK.I       | 2 | 68.48  |
|     |        | K.NM#VLQN*GTK.V                    | 2 | 36.01  |
|     |        | K.ANIQFGEN*GTTISAVTNK.A            | 2 | 101.12 |
|     |        | R.TM#VFPVMYLN*ESVLIDKETANQLK.S     | 3 | 21.99  |
|     |        | K.NMVLQN*GTK.V                     | 2 | 42     |
|     |        | K.TSLDWTTDTCNMIN*GTDGDSFHPLISK.D   | 3 | 88.12  |
|     |        | R.TM#VFPVM#YLN*ESVLIDKETANQLK.S    | 3 | 34.77  |
|     |        | K.TSLDWTTDTCN*MIN*GTDGDSFHPLISK.D  | 3 | 32.74  |
|     |        | K.AYVFERN*QSVGDPNVDLIR.T           | 3 | 62     |
|     |        | K.N*M#VLQN*GTK.V                   | 2 | 23.69  |
|     |        | R.N*GTNDGEYVFLTGEDN*YLNFSK.I       | 3 | 32.07  |
| 138 | O35566 | K.LQQEFHCCGSN*NSQDWQDSEWIR.S       | 3 | 72.38  |
|     |        | K.LQQEFHCCGSN*N*SQDWQDSEWIR.S      | 3 | 41.97  |
| 139 | O35598 | K.EGICNGFTALCPASDPKPN*FTDCNR.H     | 3 | 23.69  |

---

|     |        |                                        |   |       |
|-----|--------|----------------------------------------|---|-------|
|     |        | R.N*ISQVLEK.K                          | 2 | 29.98 |
|     |        | R.IN*TTSDEKDPTNPFR.F                   | 3 | 34.9  |
|     |        | K.EGICN*GFTALCPASDPKPN*FTDCNR.H        | 3 | 34.45 |
| 140 | O35604 | R.TEQLIQAPN*TSVHIYEPYPAGADVPPGPPLNK.E  | 3 | 52.33 |
|     |        | R.LYN*VTHQFCN*ASVMDPTCVR.C             | 3 | 31.68 |
|     |        | R.LIASN*ITETM#R.S                      | 2 | 73.02 |
|     |        | R.LIASN*ITETMR.S                       | 2 | 77.29 |
|     |        | R.TEQLIQAPN*TSVHIYEPYPAGADVPPGPPLN*K.E | 3 | 21.75 |
| 141 | O54890 | R.CNNGN*GTFECGVCR.C                    | 2 | 37.77 |
|     |        | K.NAVN*CTYKNEDDCVVR.F                  | 2 | 36.5  |
| 142 | O55026 | R.LLN*LTSPEATAK.V                      | 2 | 43.88 |
| 143 | O55111 | R.YVQN*GTYTAK.V                        | 2 | 44.9  |
| 144 | O70570 | R.ANLINFPEN*N*TFVINIEQLTQDDTGSYK.C     | 2 | 41.49 |
|     |        | R.ANLIN*FPEN*NTFVINIEQLTQDDTGSYK.C     | 2 | 26.28 |
|     |        | R.N*VTIECPFK.R                         | 2 | 27.77 |
|     |        | R.ANLINFPEN*NTFVINIEQLTQDDTGSYK.C      | 3 | 66.54 |
|     |        | K.TN*QSCELVIDSTEK.V                    | 2 | 82.38 |
|     |        | K.KTN*QSCELVIDSTEK.V                   | 2 | 84.96 |
| 145 | O88322 | K.TNIEGQVPFIPAN*FTAHTPYK.E             | 3 | 38.95 |
| 146 | O88325 | R.LLLTAAPN*LTSPAFR.Y                   | 2 | 60.58 |
| 147 | O88531 | R.CVN*ESYK.K                           | 2 | 34.37 |
|     |        | R.CVN*ESYKK.N                          | 2 | 38.64 |
| 148 | O88783 | R.TLPHPDLTTHIPPPSPSPTLN*NTSLSR.K       | 4 | 27.96 |
|     |        | K.TWN*QSIALR.L                         | 2 | 41.44 |
|     |        | K.GSYEIIAAN*GEDTDVDKLTNSPQNQN*ITVPR.G  | 3 | 29.07 |
|     |        | K.GSYEIIAANGEDTDVDKLTN*SPQNQN*ITVPR.G  | 3 | 41.91 |

---

|     |        |                                                 |   |       |
|-----|--------|-------------------------------------------------|---|-------|
|     |        | K.GSYEIIAANGEDTDVDKLTNSPQNQN*ITVPR.G            | 3 | 49.59 |
| 149 | O88792 | R.AFM#N*SSFTIDPK.S                              | 2 | 75.54 |
| 150 | O88829 | R.LNSAPVEGYSEHVGN*K.T                           | 3 | 23.48 |
| 151 | O89001 | R.FANEYPN*ITR.L                                 | 2 | 52.69 |
|     |        | K.DLDTDFTSN*ASQPETK.A                           | 2 | 42.74 |
| 152 | O89017 | K.SHTN*TSHVMQYGN*K.S                            | 2 | 71.48 |
|     |        | K.SHTN*TSHVM#QYGNK.S                            | 3 | 27.14 |
|     |        | K.SHTN*TSHVM#QYGN*K.S                           | 3 | 45.42 |
|     |        | R.N*GIPDEQIIVMMYDDIAN*SEENPTPGVVIN*RPN*GTDVYK.G | 3 | 37.57 |
|     |        | R.NGIPDEQIIVMMYDDIANSEENPTPGVVINRPN*GTDVYK.G    | 3 | 35.68 |
| 153 | O89020 | R.HVEDKFN*ETTQR.S                               | 3 | 29.9  |
| 154 | O89023 | K.DVGSGTTN*NSQACAQFLEQYFHN*SDLTEFM#R.L          | 3 | 61.43 |
|     |        | K.DVGSGTTN*N*SQACAQFLEQYFHN*SDLTEFM#R.L         | 3 | 62.08 |
|     |        | K.DVGSGTTN*NSQACAQFLEQYFHNSDLTEFM#R.L           | 3 | 91.89 |
|     |        | K.DVGSGTTN*NSQACAQFLEQYFHN*SDLTEFM#R.L          | 3 | 44.82 |
|     |        | R.QRYN*LTAK.D                                   | 2 | 66.59 |
|     |        | K.DVGSGTTN*NSQACAQFLEQYFHN*SDLTEFMR.L           | 3 | 94.44 |
|     |        | K.SSSHLPSSYFN*ASGR.A                            | 3 | 55.22 |
| 155 | O89051 | K.CYVIPLN*TSIVM#PPK.N                           | 2 | 31.36 |
|     |        | K.CYVIPLN*TSIVMPPK.N                            | 2 | 23.66 |
| 156 | P01029 | R.FSDGLESN*R.S                                  | 2 | 61.89 |
|     |        | K.ALN*VTLSSM#GR.N                               | 2 | 48.41 |
|     |        | K.N*TTCQDLQIEVK.V                               | 2 | 28.74 |
|     |        | K.ALN*VTLSSMGR.N                                | 2 | 79.41 |
| 157 | P01831 | K.VLTLAN*FTTK.D                                 | 2 | 44.37 |
| 158 | P01868 | R.EEQFN*STFR.S                                  | 2 | 46.19 |

|     |        |                                 |   |        |
|-----|--------|---------------------------------|---|--------|
| 159 | P01872 | K.IMESHPN*GTFSAK.G              | 2 | 65.72  |
|     |        | K.IM#ESHPN*GTFSAK.G             | 2 | 56.77  |
| 160 | P01895 | R.YLKN*GN*ATLLR.T               | 2 | 46.93  |
|     |        | R.YYN*QSAGGSHTLQWM#AGCDVESDGR.L | 3 | 71.56  |
|     |        | R.YYN*QSAGGSHTLQWM#AGCDVESDGR.L | 3 | 52.23  |
|     |        | R.YYN*QSAGGSHTLQWM#AGCDVESDGR.L | 3 | 48.46  |
|     |        | R.YYN*QSAGGSHTLQWMAGCDVESDGR.L  | 3 | 44.67  |
|     |        | R.YYN*QSAGGSHTLQWM#AGCDVESDGR.L | 3 | 25.59  |
|     |        | K.NGN*ATLLR.T                   | 2 | 71.84  |
|     |        | R.YYN*QSAGGSHTLQWMAGCDVESDGR.L  | 3 | 66.34  |
|     |        | K.N*GN*ATLLR.T                  | 2 | 69.49  |
| 161 | P01902 | R.YLELGN*ETLLR.T                | 2 | 71.3   |
|     |        | R.RYLELGN*ETLLR.T               | 3 | 53.57  |
|     |        | K.EQN*YTCHVHHK.G                | 2 | 33.63  |
| 162 | P01921 | K.GECYYTN*GTQR.I                | 2 | 43.48  |
| 163 | P03987 | R.EAQYN*STFR.V                  | 2 | 48.48  |
| 164 | P04227 | R.SN*FTPATNEAPQATVFPK.S         | 2 | 42.89  |
|     |        | K.RSN*FTPATNEAPQATVFPK.S        | 3 | 47.41  |
|     |        | R.SN*FTPATNEAPQATVFPK.S         | 2 | 62.82  |
|     |        | R.SN*FTPATN*EAPQATVFPK.S        | 2 | 25.92  |
| 165 | P06339 | R.LGN*ETLQR.S                   | 2 | 66.91  |
| 166 | P06683 | K.GAGEVSPAESSKPTN*ISAK.F        | 3 | 24.38  |
| 167 | P06797 | R.AEFAVAN*DTGFVDIPQKEK.A        | 2 | 102.66 |
|     |        | K.YRAEFAVAN*DTGFVDIPQKEK.A      | 3 | 38.46  |
| 168 | P07309 | K.TLGISPFHEFADVFTAN*DSGHR.H     | 3 | 54.51  |
| 169 | P07759 | K.NLINDYVSN*QTQGM#IK.E          | 2 | 27.71  |

---

|     |        |                                                  |   |       |
|-----|--------|--------------------------------------------------|---|-------|
|     |        | K.FN*LTETPEADIHQGFGN*LLQSLSQPEDQDQINIGNAM#FIEK.D | 3 | 25.22 |
|     |        | K.NLINDYVSN*QTQGM#IK.E                           | 2 | 41.31 |
|     |        | K.NLINDYVSN*QTQGM#IK.E                           | 2 | 99.64 |
|     |        | K.YTGN*ASALLILPDQGR.M                            | 2 | 67.23 |
|     |        | K.FN*LTETPEADIHQGFGNLLQSLSQPEDQDQINIGNAM#FIEK.D  | 3 | 43.38 |
|     |        | K.FN*LTETPEADIHQGFGNLLQSLSQPEDQDQINIGNAMFIEK.D   | 3 | 32.64 |
|     |        | K.FN*LTETPEADIHQGFGN*LLQSLSQPEDQDQINIGN*AMFIEK.D | 3 | 28.92 |
|     |        | K.NLINDYVSN*QTQGM#IK.E                           | 2 | 49.87 |
|     |        | K.NLINDYVSN*QTQGM#IK.E                           | 2 | 75.57 |
|     |        | K.FN*LTETPEADIHQGFGNLLQSLSQPEDQDQINIGNAMFIEK.D   | 3 | 39.55 |
|     |        | K.NLIN*DYVSN*QTQGM#IK.E                          | 2 | 60.96 |
|     |        | K.FN*LTETPEADIHQGFGNLLQSLSQPEDQDQINIGN*AM#FIEK.D | 3 | 35.03 |
|     |        | K.FN*LTETPEADIHQGFGNLLQSLSQPEDQDQINIGNAM#FIEK.D  | 3 | 42.87 |
| 170 | P08113 | K.HN*N*DTQHIWESDSNEFSVIADPR.G                    | 3 | 27.3  |
|     |        | K.HNN*DTQHIWESDSN*EFSVIADPR.G                    | 3 | 38.42 |
|     |        | K.HNN*DTQHIWESDSNEFSVIADPR.G                     | 3 | 38.46 |
|     |        | R.EEEAIQLDGLN*ASQIR.E                            | 2 | 92.89 |
|     |        | R.EGSRTDDEVVQREEEAIQLDGLN*ASQIR.E                | 4 | 25.99 |
|     |        | K.HNN*DTQHIWESDSNEFSVIADPR.G                     | 3 | 81.8  |
|     |        | R.TDDEVVQREEEAIQLDGLN*ASQIR.E                    | 3 | 67.54 |
|     |        | R.EEEAIQLDGLN*ASQIR.E                            | 2 | 30.12 |
|     |        | R.TDDEVVQREEEAIQLDGLN*ASQIR.E                    | 3 | 20.96 |
|     |        | R.TDDEVVQREEEAIQLDGLN*ASQIR.E                    | 4 | 77.83 |
|     |        | R.ELISN*ASDALDK.I                                | 2 | 47.85 |
| 171 | P08121 | R.ASQN*ITYHCK.N                                  | 2 | 39.48 |
| 172 | P08607 | R.LVGSPFIGCTVFN*K.T                              | 2 | 45.65 |

---

|     |        |                                      |   |       |
|-----|--------|--------------------------------------|---|-------|
|     |        | R.CEQEASEDLKPALTGN*K.T               | 2 | 67.54 |
|     |        | R.LACLN*GTVLR.G                      | 2 | 72.8  |
| 173 | P09055 | K.NGVN*GTGENGR.K                     | 2 | 50.43 |
|     |        | K.KDTCAQECSHFN*LTK.V                 | 3 | 46.15 |
|     |        | K.N*GVN*GTGEN*GR.K                   | 2 | 58.1  |
|     |        | R.KEN*SSEICSNN*GECVCGQCVCR.K         | 3 | 47.21 |
|     |        | R.KEN*SSEICSN*N*GECVCGQCVCR.K        | 3 | 41.45 |
|     |        | K.N*GVN*GTGENGR.K                    | 2 | 60.07 |
|     |        | K.SYCKN*GVN*GTGENGR.K                | 3 | 40.15 |
|     |        | K.DTCAQECSHFN*LTK.V                  | 2 | 47.64 |
|     |        | K.NGVN*GTGEN*GRK.C                   | 2 | 53.56 |
|     |        | R.KEN*SSEICSN*N*GECVCGQCVCR.K        | 3 | 53.67 |
|     |        | K.CHEGN*GTFECGACR.C                  | 3 | 39.94 |
|     |        | K.N*GVN*GTGEN*GRK.C                  | 2 | 33.23 |
|     |        | R.KEN*SSEICSNNGECVCGQCVCR.K          | 3 | 64.89 |
|     |        | K.SYCKN*GVN*GTGEN*GRK.C              | 3 | 38.31 |
|     |        | K.N*GVN*GTGENGRK.C                   | 2 | 37.53 |
|     |        | K.SCGECIQAGPNCGWCTN*TTFLQEGM#PTSAR.C | 3 | 23.89 |
|     |        | K.SCGECIQAGPNCGWCTN*TTFLQEGMPTSAR.C  | 3 | 21.07 |
|     |        | K.NGVN*GTGEN*GR.K                    | 2 | 49.75 |
| 174 | P09581 | K.THNSVGN*SSQYFR.A                   | 3 | 43.36 |
| 175 | P0C7W3 | K.SWVQGN*LTACGR.S                    | 2 | 23.55 |
|     |        | K.SWVQGN*LTACGR.S                    | 2 | 38.25 |
| 176 | P10126 | R.VETGVLKPGM#VVTFAPVN*VTTEVK.S       | 3 | 48.6  |
|     |        | R.VETGVLKPGMVVTFAPVN*VTTEVK.S        | 3 | 43.41 |
| 177 | P10404 | K.THQALCN*TTQK.T                     | 3 | 30    |

|     |        |                                                |   |        |
|-----|--------|------------------------------------------------|---|--------|
| 178 | P10493 | R.CVAN*YTGNGR.Q                                | 2 | 29.05  |
|     |        | R.CVAN*YTGN*GR.Q                               | 2 | 26.81  |
| 179 | P10605 | K.QN*TTWQAGR.N                                 | 2 | 34.9   |
| 180 | P10852 | K.LM#NAPLYLAEWQN*ITK.N                         | 2 | 54.18  |
|     |        | K.LMNAPLYLAEWQN*ITK.N                          | 2 | 56.49  |
|     |        | K.LM#N*APLYLAEWQN*ITK.N                        | 2 | 20.22  |
| 181 | P11087 | R.LM#STEASQN*ITYHCK.N                          | 3 | 27.22  |
|     |        | R.VPN*GETWKPEVCLICICHN*GTAVCDDVQCNEELDCPNPQR.R | 4 | 32.93  |
|     |        | R.VPN*GETWKPEVCLICICHN*GTAVCDDVQCNEELDCPNPQR.R | 4 | 21.19  |
|     |        | R.VPNGETWKPEVCLICICHN*GTAVCDDVQCNEELDCPNPQRR.E | 5 | 35.71  |
|     |        | R.VPNGETWKPEVCLICICHN*GTAVCDDVQCNEELDCPNPQRR.E | 5 | 25.83  |
|     |        | R.VPNGETWKPEVCLICICHN*GTAVCDDVQCNEELDCPNPQRR.E | 5 | 31.22  |
| 182 | P11247 | R.SYN*DSVDPR.I                                 | 2 | 55.91  |
| 183 | P11276 | R.DQCIVDDITYNVN*DTFHK.R                        | 2 | 93.97  |
|     |        | R.DQCIVDDITYNVN*DTFHKR.H                       | 4 | 35.49  |
|     |        | R.N*YTDCTSEGR.R                                | 2 | 57.37  |
|     |        | R.ESNPLTAQQTTKLDAPTNLQFVN*ETDR.T               | 3 | 37.45  |
|     |        | K.LDAPTNLQFVN*ETDR.T                           | 3 | 33.31  |
|     |        | K.LDAPTNLQFVN*ETDRTVLVVTWTPPR.A                | 3 | 29.14  |
|     |        | K.LDAPTNLQFVN*ETDR.T                           | 2 | 94.98  |
|     |        | R.N*YTDCTSEGRR.D                               | 2 | 31.2   |
| 184 | P11438 | R.AFNISPN*DTSSGSCGINLVTLK.V                    | 2 | 115.64 |
|     |        | R.VYMKN*VTVVLR.D                               | 3 | 38.17  |
|     |        | R.GYLLTLN*FTKN*TTR.Y                           | 3 | 21.25  |
|     |        | R.LNMTLPDALVPTFSISN*HSLK.A                     | 3 | 20.3   |
|     |        | R.LN*M#TLPDALVPTFSISN*HSLK.A                   | 3 | 22.73  |



---

|     |        |                                 |   |       |
|-----|--------|---------------------------------|---|-------|
|     |        | R.GYLLTLN*FTK.N                 | 2 | 65.5  |
|     |        | R.AFN*ISPN*DTSSGSCGIN*LVTLK.V   | 2 | 44.28 |
|     |        | R.LN*MTLPDALVPTFSISN*HSLK.A     | 3 | 57.48 |
|     |        | R.VYM#KN*VTVVL.R.D              | 3 | 27.44 |
|     |        | K.N*VTVVL.R.D                   | 2 | 45.29 |
|     |        | R.AFNISPN*DTSSGSCGIN*LVTLK.V    | 2 | 99.37 |
| 185 | P11609 | R.CLQM#SSFAN*R.S                | 2 | 51.32 |
|     |        | K.VLNADQGTSATVQMLLN*DTCPLFVR.G  | 2 | 82.18 |
|     |        | K.VLNADQGTSATVQM#LLN*DTCPLFVR.G | 3 | 47.28 |
| 186 | P11688 | R.TEKDPQNDPVGTCYLSTEN*FTR.I     | 3 | 62.9  |
|     |        | K.NALN*LTFAQNLGEGGAYEAE.LR.V    | 3 | 31.5  |
|     |        | R.HPGN*FSSLSCDYFAVN*QSR.Q       | 3 | 24.19 |
|     |        | R.TEKDPQNDPVGTCYLSTEN*FTR.I     | 2 | 25    |
| 187 | P11881 | R.VETGEN*CTSPAPK.E              | 2 | 78.46 |
| 188 | P12265 | R.IAN*ETGGHSGPR.T               | 2 | 83.59 |
|     |        | R.ITIAIN*NTLTPHTLPPGTIVYK.T     | 3 | 55.33 |
| 189 | P13597 | R.LDETDC LGN*WTWQEGSQTLK.C      | 2 | 72.16 |
|     |        | R.EAFLPQGGSVQVN*CSSSCK.E        | 2 | 50.52 |
|     |        | R.TELDLRPQGLALFSN*VSEAR.S       | 3 | 39.99 |
| 190 | P14094 | R.FKLDWLGN*CSGLNDDSYGYR.E       | 2 | 121.5 |
|     |        | R.VLGFKPKPPKN*ESLETYPLMM#K.Y    | 3 | 31.5  |
|     |        | K.LDWLGN*CSGLNDDSYGYR.E         | 2 | 95.32 |
|     |        | R.VLGFKPKPPKN*ESLETYPLMMK.Y     | 3 | 42.86 |
|     |        | K.YLQPLLA VQFTN*LTVDTEIR.V      | 2 | 75.25 |
|     |        | R.VLGFKPKPPKN*ESLETYPLM#M#K.Y   | 3 | 21.48 |
| 191 | P15089 | R.NQN*STCIGTDLNR.N              | 2 | 50.45 |

---

---

|     |        |                                     |   |       |
|-----|--------|-------------------------------------|---|-------|
| 192 | P15208 | K.HN*LTITQGK.L                      | 2 | 64.51 |
|     |        | K.ECLGN*CSEPDDPTK.C                 | 2 | 72.61 |
|     |        | R.GLSPGN*YSVR.V                     | 2 | 22.97 |
| 193 | P16301 | K.AELSN*HTRPVILVPGCLG NR.L          | 3 | 39.81 |
|     |        | R.IVYN*HSSGR.V                      | 2 | 65.3  |
| 194 | P16406 | K.IALN*LTM#YLK.S                    | 2 | 33.36 |
|     |        | R.YGMQNSGNEAAWN*YTLEQYQK.T          | 3 | 39.8  |
|     |        | K.GGITLNAN*LSGDAFLK.I               | 2 | 35.54 |
|     |        | R.EALGN*ASQLFDSWLK.G                | 3 | 23.36 |
|     |        | R.YGM#QN*SGNEAAWN*YTLEQYQK.T        | 3 | 33.67 |
|     |        | R.YGM#QNSGNEAAWN*YTLEQYQK.T         | 3 | 29.06 |
|     |        | R.VNYEGGTWDWIAEALSSN*HTR.F          | 3 | 49.44 |
|     |        | K.GWLN*GSLVGFYK.T                   | 2 | 65.41 |
| 195 | P17047 | K.VPFIFNINPATTN*FTGSCQPQSAQLR.L     | 3 | 63.4  |
|     |        | K.EASHYSIHDI VLSYN*TSDSTVFP GAVAK.G | 3 | 51.24 |
|     |        | K.CNSVLTYN*LTPVVQK.Y                | 2 | 89.33 |
|     |        | K.VQPFN*VTK.G                       | 2 | 45.31 |
|     |        | K.VPFIFNINPATTN*FTGSCQPQSAQLR.L     | 3 | 32.39 |
|     |        | R.LN*NSQIK.Y                        | 2 | 47.63 |
|     |        | K.YWGIHLQAFVQN*GTVSK.N              | 3 | 21.38 |
|     |        | K.VPFIFN*INPATTN*FTGSCQPQSAQLR.L    | 3 | 27.01 |
| 196 | P17439 | R.MELSVGAIQAN*R.T                   | 2 | 60.79 |
|     |        | R.VYTYADTPNDFQLSN*FSLPEEDTK.L       | 2 | 53.8  |
|     |        | R.RMELSVGAIQAN*R.T                  | 3 | 24.08 |
|     |        | R.RM#ELSVGAIQAN*R.T                 | 3 | 40.14 |
|     |        | R.M#ELSVGAIQAN*R.T                  | 2 | 69.13 |

---

|     |        |                                      |   |        |
|-----|--------|--------------------------------------|---|--------|
|     |        | R.DLGPALAN*SSHDVK.L                  | 2 | 63.05  |
| 197 | P18572 | K.SQLTISNLDVNVDPGTYVCN*ATNAQGTTR.E   | 3 | 31.05  |
|     |        | K.TSDTGEEEAITN*STEANGK.Y             | 2 | 98.74  |
|     |        | K.TQLTCSLN*SSGVDIVGHR.W              | 2 | 108.58 |
|     |        | K.TSDTGEEEAITN*STEAN*GKYVVVSTPEK.S   | 3 | 99.53  |
|     |        | K.TSDTGEEEAITN*STEAN*GK.Y            | 2 | 140.43 |
| 198 | P19324 | R.SLSN*STAR.N                        | 2 | 57.63  |
| 199 | P20060 | R.LLYISAEDFSIDHSPN*STAGPSCSLLQEAFR.R | 3 | 52.27  |
| 200 | P21614 | K.ICQN*LSK.K                         | 2 | 47.71  |
|     |        | K.ICQN*LSKK.N                        | 2 | 32.02  |
| 201 | P23953 | K.N*ATSYPPMCSQDAGWAK.I               | 2 | 55.77  |
|     |        | K.EGASEEETN*LSK.M                    | 2 | 50.15  |
|     |        | K.NIQAVNEIATLSQCN*DTSSAAM#VQCLR.Q    | 3 | 31.1   |
|     |        | K.NIQAVNEIATLSQCN*DTSSAAMVQCLR.Q     | 3 | 29.89  |
|     |        | K.N*IQAVNEIATLSQCN*DTSSAAMVQCLR.Q    | 3 | 28.33  |
|     |        | K.N*ATSYPPM#CSQDAGWAK.I              | 2 | 48.04  |
| 202 | P24549 | K.GFFVQPTVFSN*VTDEM.R.I              | 2 | 29.39  |
| 203 | P24638 | R.YHGFLN*TSYHR.Q                     | 3 | 28.29  |
|     |        | K.N*LTLMATTSQFPK.L                   | 2 | 30.74  |
|     |        | R.QTPEYQN*R.S                        | 2 | 36.47  |
|     |        | R.YEQLQN*ETR.Q                       | 2 | 57.04  |
| 204 | P24668 | R.LRPLFN*K.S                         | 2 | 30.76  |
|     |        | R.EASN*HSSGAGLVQINK.S                | 2 | 86.96  |
| 205 | P25446 | R.CTLCDDEEHGLEVETN*CTLTQNTK.C        | 3 | 54.14  |
| 206 | P26262 | R.GSNFN*ISK.T                        | 2 | 42.42  |
| 207 | P27046 | R.GSPGN*ASQGSIHLSHSPQLALQADPR.D      | 3 | 33.68  |

|     |        |                                         |   |        |
|-----|--------|-----------------------------------------|---|--------|
|     |        | R.DSVIN*LSESVEDGPR.G                    | 2 | 28.34  |
| 208 | P27656 | K.RIPITLGEGITSN*K.T                     | 3 | 37.61  |
| 209 | P28653 | R.M#IEN*GSLSFLPTLR.E                    | 2 | 94.52  |
|     |        | R.MIEN*GSLSFLPTLR.E                     | 2 | 74.3   |
|     |        | K.LLQVVYLHSNN*ITK.V                     | 3 | 23.54  |
| 210 | P28654 | K.LGLSFNSITVMEN*GSLANVPHLR.E            | 3 | 67.25  |
|     |        | K.LGLSFNSITVM#EN*GSLANVPHLR.E           | 3 | 66.21  |
|     |        | R.ISDTN*ITAIPQGLPTSLTEVHLDGNK.I         | 3 | 68.29  |
| 211 | P28665 | K.SLGNVN*FSVSAEAQQSSEPCGSEVATVPETGRK.D  | 3 | 50.01  |
|     |        | K.SLGNVN*FSVSAEAQQSSEPCGSEVATVPETGRK.D  | 3 | 106.03 |
|     |        | K.YLN*ETQQLTQK.I                        | 2 | 73.2   |
|     |        | R.N*ASFVYTK.A                           | 2 | 42.94  |
|     |        | K.SLGNVN*FSVSAEAQQSSEPCGSEVATVPETGRK.D  | 3 | 83.28  |
|     |        | R.EVNSQLDNNGCSTQEVN*ITELQSK.K           | 2 | 104.67 |
|     |        | R.EVNSQLDNNGCSTQEVN*ITELQSK.K           | 2 | 68.31  |
|     |        | K.YLN*ETQQLTQK.I                        | 2 | 22.12  |
|     |        | K.SLGNVN*FSVSAEAQQSSEPCGSEVATVPETGRK.D  | 3 | 85.54  |
|     |        | R.EVNSQLDNNGCSTQEVN*ITELQSK.K           | 2 | 29.85  |
|     |        | R.EVNSQLDNN*GCSTQEVN*ITELQSK.K          | 2 | 43.33  |
|     |        | K.SLDEEAIKEN*NSIHWK.R                   | 3 | 48.88  |
|     |        | K.TIEQERN*ASFVYTK.A                     | 2 | 34.68  |
|     |        | K.SLGN*VN*FSVSAEAQQSSEPCGSEVATVPETGRK.D | 3 | 73.54  |
| 212 | P28843 | K.KLDFIVLN*ETR.F                        | 2 | 98.54  |
|     |        | K.LDFIVLN*ETR.F                         | 2 | 74.42  |
|     |        | R.N*STVM#SR.A                           | 2 | 31.47  |
| 213 | P29416 | K.SAEGTFFIN*K.T                         | 2 | 57.45  |

|     |        |                                         |   |       |
|-----|--------|-----------------------------------------|---|-------|
| 214 | P29699 | R.CPLLTPFNDTNVVHTVNTALAAFNTQNN*GTYFK.L  | 3 | 21.22 |
|     |        | R.RPFGVVYEM#EVDTLTTCALDPTPLAN*CSVR.Q    | 4 | 39.17 |
|     |        | R.RPFGVVYEMEVDTLTTCALDPTPLAN*CSVR.Q     | 4 | 44.55 |
|     |        | R.CPLLTPFN*DTNVVHTVNTALAAFNTQNN*GTYFK.L | 3 | 52.29 |
| 215 | P29754 | M.ALN*SSTEDGIKR.I                       | 2 | 51.44 |
| 216 | P29788 | K.NNTNTGVQPEN*TSPPGDLNPR.T              | 2 | 64.83 |
| 217 | P30204 | R.FQN*FSMATDQR.L                        | 2 | 54.9  |
|     |        | R.VLNN*ITNDLR.L                         | 2 | 69.05 |
|     |        | R.FQN*FSM#ATDQR.L                       | 2 | 45.51 |
| 218 | P31428 | R.RN*WTETEV.R.G                         | 2 | 44.12 |
| 219 | P31996 | R.KAWGISVLNPN*KTK.V                     | 3 | 28.84 |
| 220 | P32261 | K.LGACN*DTLK.Q                          | 2 | 67.98 |
|     |        | R.VTINNWVAN*K.T                         | 2 | 69.76 |
|     |        | R.VTINNWVAN*KTEGR.I                     | 2 | 81.86 |
|     |        | R.VTIN*NWVAN*K.T                        | 2 | 24.47 |
| 221 | P35700 | K.HGEVCPAGWKPGSDTIKPDVN*K.S             | 4 | 24.96 |
| 222 | P35737 | K.IVPCEFGVLYPLAEN*FSR.I                 | 2 | 33.38 |
| 223 | P35951 | K.DMSDELGCVN*VTQCDGPNK.F                | 2 | 30.32 |
| 224 | P40237 | K.KGFCEADN*STVSENN*PEDWPVNTEGCM#EK.A    | 3 | 39.82 |
|     |        | K.KGFCEADN*STVSENN*PEDWPVN*TEGCM#EK.A   | 3 | 28.12 |
|     |        | K.CCGWVSHYN*WTENEELMGFTK.T              | 3 | 26.85 |
|     |        | K.KGFCEADN*STVSENNPEDWPVNTEGCM#EK.A     | 3 | 38.16 |
|     |        | R.NYTAN*ATSSR.E                         | 2 | 52.81 |
|     |        | K.KGFCEADN*STVSEN*NPEDWPVNTEGCM#EK.A    | 3 | 27.94 |
|     |        | K.KGFCEADN*STVSENN*PEDWPVNTEGCM#EK.A    | 3 | 52.57 |
|     |        | K.KGFCEADN*STVSEN*NPEDWPVNTEGCM#EK.A    | 3 | 31.35 |

---

|     |        |                                             |   |        |
|-----|--------|---------------------------------------------|---|--------|
|     |        | K.KGFCEADN*STVSENNPEDWPVNTEGCM#EK.A         | 3 | 55.5   |
| 225 | P41233 | R.YPTPGEAPGVVGNFN*K.S                       | 2 | 63.65  |
|     |        | R.EAFN*ETNQAIQTISR.F                        | 2 | 86.55  |
|     |        | K.TADILQN*LTGR.N                            | 2 | 84.98  |
|     |        | R.N*ISDYLVK.T                               | 2 | 20.5   |
| 226 | P41593 | R.TWAN*YSECLK.F                             | 2 | 34.29  |
| 227 | P42703 | R.IEGLTN*ETYR.L                             | 2 | 49.46  |
|     |        | K.LKN*ITDISQK.T                             | 2 | 36.3   |
|     |        | R.GSALPHPSN*ATWEIK.V                        | 3 | 22.36  |
|     |        | R.KVPSN*STETVIESDQFQPGVR.Y                  | 3 | 26.51  |
|     |        | K.WCN*SSR.S                                 | 2 | 20.51  |
|     |        | K.ILSYN*VSCSLNEETQSVLEIFDPQHR.A             | 3 | 41.39  |
|     |        | K.ILSYN*VSCSLN*EETQSVLEIFDPQHR.A            | 3 | 21.57  |
|     |        | K.ILSYN*VSCSLNEETQSVLEIFDPQHR.A             | 3 | 39.08  |
| 228 | P45700 | R.TCHESYN*R.T                               | 2 | 42.84  |
| 229 | P46978 | R.TILVDNNTWN*NTHISR.V                       | 2 | 101.95 |
|     |        | R.TILVDNN*TWN*NTHISR.V                      | 2 | 39.72  |
|     |        | K.VM#SWWDYGYQITAMAN*R.T                     | 2 | 34.45  |
|     |        | R.TILVDN*NTWN*NTHISR.V                      | 2 | 58.85  |
| 230 | P49182 | K.NGN*MSGISDQR.I                            | 2 | 65.67  |
|     |        | K.N*GN*MSGISDQR.I                           | 2 | 37.3   |
|     |        | R.DFVN*ASSK.Y                               | 2 | 25.97  |
|     |        | K.N*GN*M#SGISDQR.I                          | 2 | 45.81  |
|     |        | K.NGN*M#SGISDQR.I                           | 2 | 34.74  |
| 231 | P50284 | R.LVLCQPGTEAEVTDEIMDTDVNCVPCKPGHFQN*TSSPR.A | 4 | 25.3   |
| 232 | P50427 | R.WHN*GSAVWK.A                              | 2 | 33.22  |

---

|     |        |                                         |   |       |
|-----|--------|-----------------------------------------|---|-------|
| 233 | P50429 | R.IYAGMVSLMDEAVGN*VTK.A                 | 2 | 66.88 |
| 234 | P50608 | R.LYLDHNN*LTR.M                         | 2 | 49.34 |
|     |        | R.VPNNALEGLEN*LTALYLHHNEIQEVGSSM#R.G    | 4 | 27.09 |
| 235 | P51885 | K.AFEN*VTDLQWLILDHNLLENSK.I             | 3 | 50.37 |
|     |        | K.KLHINYNN*LTESVGPLPK.S                 | 2 | 61.38 |
|     |        | K.LGSFDGLVN*LTFIYLQHNQLK.E              | 3 | 38.29 |
|     |        | K.LHINYNN*LTESVGPLPK.S                  | 2 | 89.41 |
| 236 | P52430 | K.ITVVYAEN*GTVLQGTTVASVYK.G             | 3 | 44.09 |
|     |        | K.HAN*WTLTPLK.V                         | 2 | 56.21 |
| 237 | P53798 | R.LRN*QSVFN*FCAIPQVM#AIATLAACYNNQQVFK.G | 5 | 26.07 |
| 238 | P54751 | R.ERKPNN*LSDTVK.E                       | 3 | 22.49 |
|     |        | R.KPNN*LSDTVK.E                         | 2 | 66.23 |
| 239 | P55292 | R.AN*YTILK.G                            | 2 | 42.98 |
| 240 | P56528 | K.LVTQTIPCN*K.T                         | 2 | 53.85 |
|     |        | K.NPCN*ITR.E                            | 2 | 41.37 |
|     |        | K.GAFVSKNPCN*ITR.E                      | 2 | 52.54 |
| 241 | P57716 | R.N*ISGVVLADHSGSFHNR.Y                  | 3 | 48.18 |
|     |        | R.AN*NSWFQSILK.H                        | 2 | 43.64 |
|     |        | K.IYIPLN*K.T                            | 2 | 27.7  |
|     |        | R.LLN*ATHQIGCQSSISGDTGVIHVVEKEEDLK.W    | 5 | 28.44 |
| 242 | P70194 | R.GSNN*SGHDN*HSQFVR.E                   | 3 | 29.4  |
|     |        | R.GSLQSANDLSSQTQGFLQHSM#DN*ISAIQTVR.D   | 3 | 47.67 |
|     |        | K.YQM#DN*VSSLVQLLGSHLEDVNADILQTK.D      | 3 | 61.32 |
|     |        | R.GSLQSANDLSSQTQGFLQHSM#DN*ISAIQTVR.D   | 3 | 41.18 |
|     |        | K.SSTEN*TSAELHVLGR.G                    | 3 | 21.5  |
|     |        | R.DYEEN*SSSCHK.E                        | 2 | 31.07 |

|     |        |                                           |   |       |
|-----|--------|-------------------------------------------|---|-------|
|     |        | R.GSLQSandLSSQTQGFLQHSMdn*ISAQIQTVR.D     | 3 | 74.86 |
|     |        | R.LRDYEEN*SSSCHK.E                        | 3 | 60.55 |
| 243 | P70274 | R.CGNCN*LTSLEDEDFCK.T                     | 2 | 97.9  |
| 244 | P70302 | R.LAVTN*TTMTGTVLK.M                       | 2 | 86.17 |
| 245 | P70665 | K.N*SSDYGFPEIR.W                          | 2 | 60.07 |
|     |        | R.AVAYGEKN*LTFQGPLPK.K                    | 3 | 37.23 |
| 246 | P97333 | K.RGPECSQN*YTAPTGVIK.S                    | 3 | 47.61 |
|     |        | K.IAYSNN*GSDWK.T                          | 2 | 25.01 |
| 247 | P97370 | R.IIDLIPDGY PQISCLPKEEN*ATIATYPEFGVLDLK.Y | 3 | 33.73 |
|     |        | K.EEN*ATIATYPEFGVLDLK.Y                   | 2 | 59.97 |
| 248 | P97449 | R.N*ATLVN*EADKLR.S                        | 2 | 41.8  |
|     |        | R.N*ATLVNEADKLR.S                         | 2 | 73.75 |
|     |        | R.FTCN*QTTDVIIIHSK.K                      | 3 | 26.19 |
|     |        | K.NPNN*NTIHPNLR.S                         | 2 | 52.8  |
|     |        | R.FTCN*QTTDVIIIHSK.K                      | 2 | 59.27 |
|     |        | R.N*ATLVNEADK.L                           | 2 | 53.13 |
|     |        | K.SN*VTRPSEFN YIWIAPFLK.S                 | 3 | 26.45 |
|     |        | K.SGQEDHYWLDVEKN*QSAK.F                   | 4 | 27.66 |
|     |        | K.KLN*YTLK.G                              | 2 | 48.54 |
|     |        | K.NPNN*N*TIHPNLR.S                        | 3 | 27.11 |
| 249 | P97821 | R.SDIN*CSVM#EATEEK.V                      | 2 | 48.76 |
|     |        | R.SDIN*CSVMEATEEK.V                       | 2 | 80.92 |
| 250 | P97927 | K.RPASN*ISASIQR.I                         | 2 | 46.79 |
|     |        | R.N*LTEVVPQLLDQLR.T                       | 2 | 42.05 |
| 251 | Q00547 | K.QSLEEN*ITFSKQIEDLTVK.C                  | 2 | 29.33 |
| 252 | Q00896 | K.GDTH TQILEGLQFN*LTQTSEADIHK.S           | 3 | 29.55 |



---

|     |        |                                            |   |       |
|-----|--------|--------------------------------------------|---|-------|
|     |        | K.GDTHTQILEGLQFN*LTQTSEADIHK.S             | 3 | 29.89 |
|     |        | K.GDTHTQILEGLQFN*LTQTSEADIHK.S             | 3 | 70.62 |
| 253 | Q01279 | K.TCPAGIM#GEN*NTLVWK.Y                     | 2 | 48.62 |
|     |        | R.EFVENSECIQCHPECLPQAM#N*ITCTGR.G          | 3 | 57.11 |
|     |        | K.YADANN*VCHLCHAN*CTYGCAGPGLQGCEVWPSGPK.I  | 3 | 67.56 |
|     |        | R.EFVEN*SECIQCHPECLPQAM#N*ITCTGR.G         | 3 | 39.35 |
|     |        | K.YADANNVCHLCHAN*CTYGCAGPGLQGCEVWPSGPK.I   | 4 | 41.51 |
|     |        | R.EFVEN*SECIQCHPECLPQAM#N*ITCTGR.G         | 3 | 58.83 |
|     |        | K.TCPAGIMGEN*NTLVWK.Y                      | 2 | 63.98 |
|     |        | R.EFVENSECIQCHPECLPQAMN*ITCTGR.G           | 3 | 71.38 |
|     |        | K.TCPAGIMGEN*N*TLVWK.Y                     | 2 | 26.9  |
|     |        | R.DCVSCQN*VSR.G                            | 2 | 60.86 |
|     |        | K.YADAN*N*VCHLCHAN*CTYGCAGPGLQGCEVWPSGPK.I | 3 | 39.27 |
|     |        | K.DTLSIN*ATNIK.H                           | 2 | 62.21 |
|     |        | R.DIVQN*VFMSN*MSMDLQSHPPSSCPK.C            | 3 | 20.9  |
|     |        | K.CDPSCPN*GSCWGGGEEN*CQK.L                 | 2 | 57.64 |
|     |        | K.YADAN*N*VCHLCHAN*CTYGCAGPGLQGCEVWPSGPK.I | 3 | 53.6  |
|     |        | R.EFVEN*SECIQCHPECLPQAMN*ITCTGR.G          | 3 | 55.97 |
|     |        | R.EFVENSECIQCHPECLPQAM#N*ITCTGR.G          | 3 | 58.1  |
|     |        | R.EFVENSECIQCHPECLPQAMN*ITCTGR.G           | 3 | 34.58 |
|     |        | K.YADAN*N*VCHLCHAN*CTYGCAGPGLQGCEVWPSGPK.I | 3 | 79.3  |
|     |        | K.YADANN*VCHLCHAN*CTYGCAGPGLQGCEVWPSGPK.I  | 3 | 57.59 |
|     |        | R.EFVEN*SECIQCHPECLPQAMN*ITCTGR.G          | 3 | 35.01 |
|     |        | K.CDPSCPN*GSCWGGGEENCQK.L                  | 2 | 86.86 |
|     |        | R.EFVENSECIQCHPECLPQAM#N*ITCTGR.G          | 3 | 53.64 |
|     |        | R.EFVENSECIQCHPECLPQAMN*ITCTGR.G           | 3 | 32.07 |

---

|     |        |                                      |   |        |
|-----|--------|--------------------------------------|---|--------|
|     |        | R.EFVEN*SECIQCHPECLPQAM#N*ITCTGR.G   | 3 | 61.38  |
|     |        | R.EFVENSECIQCHPECLPQAM#N*ITCTGR.G    | 3 | 43.49  |
| 254 | Q01339 | K.NISFACN*PGFFLN*GTSSSK.C            | 2 | 102.47 |
|     |        | K.N*ISFACNPGFFLN*GTSSSK.C            | 2 | 72.78  |
|     |        | K.DYRPSAGN*NSLYQDTVVK.C              | 2 | 67.15  |
|     |        | R.YTSFEYPKN*ISFACNPGFFLN*GTSSSK.C    | 3 | 79.64  |
|     |        | R.YTSFEYPKNISFACN*PGFFLN*GTSSSK.C    | 3 | 66.14  |
| 255 | Q02788 | R.M#ALLQYGSQNQQQVAFPLTYN*VTIHEALER.A | 3 | 30.41  |
|     |        | R.GTFTDCALAN*MTQQIR.Q                | 2 | 98.82  |
|     |        | R.MALLQYGSQNQQQVAFPLTYN*VTIHEALER.A  | 3 | 81.32  |
|     |        | R.RGTFTDCALAN*MTQQIR.Q               | 2 | 74.42  |
|     |        | R.GTFTDCALAN*M#TQQIR.Q               | 2 | 96.05  |
|     |        | R.N*M#TLFSDLVAEK.F                   | 2 | 82.99  |
|     |        | R.RGTFTDCALAN*M#TQQIR.Q              | 3 | 46.95  |
|     |        | R.M#ALLQYGSQNQQQVAFPLTYN*VTIHEALER.A | 3 | 30.5   |
|     |        | R.M#ALLQYGSQNQQQVAFPLTYN*VTIHEALER.A | 3 | 84.04  |
|     |        | R.N*MTLFSDLVAEK.F                    | 2 | 77.98  |
| 256 | Q03311 | K.DN*DSLITR.K                        | 2 | 54.98  |
|     |        | K.DN*DSLITRK.E                       | 2 | 38.56  |
|     |        | K.YGHPN*GTQGNSTM#WPVFTSTEQK.Y        | 3 | 22.45  |
|     |        | K.YGHPNGTQGN*STM#WPVFTSTEQK.Y        | 3 | 28.6   |
|     |        | R.RVN*YTR.A                          | 2 | 41.97  |
| 257 | Q04857 | R.N*FTAADWGHSR.D                     | 2 | 65.96  |
|     |        | K.N*ITAQICIDKK.C                     | 2 | 37.82  |
|     |        | K.ENYAELLDDGFLKN*ITAQICIDKK.C        | 3 | 35.16  |
|     |        | R.RN*FTAADWGHSR.D                    | 3 | 46.68  |

|     |        |                                    |   |       |
|-----|--------|------------------------------------|---|-------|
| 258 | Q05685 | K.NACCSVN*TSQELHK.A                | 2 | 76.99 |
| 259 | Q06770 | K.DLFTN*QSDFADTTK.D                | 2 | 81.38 |
|     |        | R.GSTQYLENLGFN*M#SK.M              | 2 | 61.3  |
|     |        | K.VPMMVQSGN*ISYFR.D                | 2 | 77.18 |
|     |        | K.VPMM#VQSGN*ISYFR.D               | 2 | 26.4  |
|     |        | K.VPM#MVQSGN*ISYFR.D               | 2 | 89.75 |
|     |        | R.GSTQYLENLGFN*MSK.M               | 2 | 41.98 |
| 260 | Q06890 | R.QELN*DSLQVAER.L                  | 2 | 67.47 |
| 261 | Q07113 | R.TQYACPPFN*VTECSVQDAAGNSIDLSSLR.Y | 3 | 21.54 |
|     |        | R.AGIN*ASYSEK.G                    | 2 | 62.66 |
|     |        | K.ISTN*ITLVCKPGDLESAPVLR.A         | 3 | 64.25 |
|     |        | K.MN*YTGGDTCHK.V                   | 2 | 22.75 |
| 262 | Q07456 | K.KEDSCQLN*YSEGPCCLGM#QER.Y        | 3 | 56.58 |
|     |        | K.EDSCQLN*YSEGPCCLGM#QER.Y         | 3 | 52.82 |
|     |        | K.EDSCQLN*YSEGPCCLGMQER.Y          | 2 | 81.51 |
|     |        | K.KEDSCQLN*YSEGPCCLGMQER.Y         | 3 | 49.2  |
|     |        | K.KEDSCQLN*YSEGPCCLGM#QER.Y        | 3 | 52.26 |
| 263 | Q07797 | K.APIPTALDTN*SSK.T                 | 2 | 83.32 |
|     |        | R.ALGYEN*ATQALGR.A                 | 2 | 78.28 |
|     |        | K.GLN*LTEDTYKPR.L                  | 2 | 69.95 |
| 264 | Q07968 | R.TYEN*GSSVEYR.C                   | 2 | 56.67 |
| 265 | Q08857 | K.RPYIVPILWLN*ETGTIGDEK.A          | 3 | 60.87 |
|     |        | K.VFN*GKDN*ISK.V                   | 2 | 64    |
|     |        | K.VISNN*CTSYGVLDIGK.C              | 2 | 98.26 |
|     |        | R.QFWIFDVQNPDDVAKN*SSK.I           | 3 | 42.38 |
| 266 | Q09200 | K.EQVVGLLAQNN*CSCEK.G              | 2 | 53.38 |

---

|     |        |                                   |   |        |
|-----|--------|-----------------------------------|---|--------|
| 267 | Q2HXL6 | K.LLPAFN*TTSGLPYPR.I              | 2 | 39     |
| 268 | Q2VLH6 | R.QLGCADN*GTVKPIPSDK.T            | 3 | 28.68  |
|     |        | R.LAGGENN*CSGR.V                  | 2 | 80.46  |
|     |        | R.LAGGEN*N*CSGR.V                 | 2 | 54.24  |
| 269 | Q3KQQ2 | R.AFVEN*ITVLENSLVFK.F             | 2 | 111.87 |
| 270 | Q3TCN2 | R.LEDGFHPDAVAWAN*LTNAIR.E         | 3 | 41.87  |
|     |        | R.SDLNPAN*GSYPFQALHQR.A           | 3 | 20.59  |
| 271 | Q3TDQ1 | K.AMSSN*ETAAYK.I                  | 2 | 72.94  |
|     |        | K.AM#SSN*ETAAYK.I                 | 2 | 67.5   |
|     |        | R.VMSWWDYGYQIAGMAN*R.T            | 2 | 39.6   |
|     |        | R.TTLVDNNTWN*NSHIALVGK.A          | 2 | 115.22 |
| 272 | Q3TDT5 | R.GSN*FTAICVLK.E                  | 2 | 58.38  |
|     |        | R.EQVTVIN*R.T                     | 2 | 25.97  |
| 273 | Q3TJI8 | K.QSN*GSIAVISLAGK.M               | 2 | 133.1  |
| 274 | Q3TKX1 | R.QLLQTQVASPAIHPPVSYN*DTAPR.I     | 3 | 44.09  |
| 275 | Q3TQC7 | R.GYLTSFEMFN*STFK.L               | 2 | 73.89  |
|     |        | R.GYLTSFEM#FN*STFK.L              | 2 | 74.26  |
| 276 | Q3TQN1 | R.LGYDPYANPPNYGNPDPIVIN*NTHR.V    | 3 | 50.03  |
| 277 | Q3TVI8 | R.SPN*DSEAWHQK.K                  | 3 | 25.04  |
| 278 | Q3TYD4 | R.ALADVLDIADDN*SSR.A              | 2 | 53.68  |
| 279 | Q3TYE5 | R.GTDN*ITVR.Q                     | 2 | 40.36  |
| 280 | Q3U1U4 | R.TPVLN*CSVAVCK.R                 | 2 | 34.58  |
| 281 | Q3U3R4 | R.TEVILQGTVSPN*ASAPDAVWEDYEFK.C   | 3 | 27.96  |
| 282 | Q3U422 | K.VTN*DSSSSSSSSSDSDSDGEEHSDRAPR.V | 3 | 27.57  |
| 283 | Q3U9N4 | K.N*YTTDLLTK.L                    | 2 | 23.15  |
|     |        | R.CPTN*NTCCK.L                    | 2 | 50.44  |

---

---

|     |        |                                           |   |       |
|-----|--------|-------------------------------------------|---|-------|
| 284 | Q3UAM9 | R.KLN*ASIVTSFVELPLVSN*VSLR.A              | 3 | 24.26 |
| 285 | Q3UEG6 | R.YIEQFKDTLN*TSVATSIAGFFAEPIQGVNGVVQYPK.E | 3 | 36.05 |
|     |        | R.YIEQFKDTLN*TSVATSIAGFFAEPIQGVNGVVQYPK.E | 3 | 27.3  |
| 286 | Q3UPN1 | R.N*TTISVHPSTR.L                          | 2 | 32.73 |
| 287 | Q3UQ28 | R.ILCDNSDN*ITR.V                          | 2 | 45.05 |
| 288 | Q3UUQ7 | K.LHVAQPEN*DSHVALLK.M                     | 3 | 32.78 |
| 289 | Q3V3R4 | K.EN*M#TFGSTLVTNPK.G                      | 2 | 54.2  |
|     |        | K.EN*MTFGSTLVTNPK.G                       | 2 | 62.33 |
|     |        | R.TVVQYSPNLIFSGIEEIQKDSCESNQN*ITCR.V      | 3 | 56.71 |
|     |        | R.YN*HTGQVVIYK.M                          | 2 | 59.18 |
|     |        | K.VYVYAVN*QTR.F                           | 2 | 57.49 |
|     |        | K.QTQVGIVQYGAN*VTHEFNLNK.Y                | 3 | 69.75 |
|     |        | R.VTLDFN*LTDPEN*GPVLDDALPN*SVHGHIPFAK.D   | 4 | 27.13 |
|     |        | K.HFFN*VSDELALVTIVK.A                     | 3 | 35.45 |
|     |        | K.LDLPVN*TSIPN*VTEIK.E                    | 2 | 62.45 |
|     |        | K.AHFSSLN*LTIR.G                          | 2 | 42.78 |
|     |        | K.ANQIVIPHN*TTFQTEPTK.M                   | 2 | 53.94 |
|     |        | R.GELQSEN*SSLTLSSSNR.K                    | 2 | 30.02 |
|     |        | R.TVVQYSPNLIFSGIEEIQKDSCESNQN*ITCR.V      | 3 | 25.42 |
|     |        | R.GELQSEN*SSLTLSSSNR.K                    | 2 | 75.93 |
|     |        | K.LDLPVN*TSIPNVTEIK.E                     | 2 | 50.56 |
|     |        | K.DSCESNQN*ITCR.V                         | 2 | 60.32 |
| 290 | Q4PZA2 | K.LGGWN*ITGPWAK.D                         | 2 | 63.24 |
|     |        | R.DYYLN*KTENEK.V                          | 2 | 56.1  |
|     |        | K.LLGGGDEDAIRPQM#QQILDFETALAN*ITIPQEK.R   | 3 | 46.34 |
|     |        | K.N*SSVEAFK.Q                             | 2 | 44.14 |

---

---

|     |        |                                                   |   |       |
|-----|--------|---------------------------------------------------|---|-------|
|     |        | K.HLLEN*ATASVSEAER.K                              | 2 | 89.31 |
|     |        | K.LLGGGDEDAIRPQM#QQILDFETALAN*ITIPQEK.R           | 3 | 47.83 |
|     |        | R.FFN*FSWR.V                                      | 2 | 43.46 |
|     |        | R.QVSTLIN*NTDK.C                                  | 2 | 60.29 |
|     |        | R.DYYLN*K.T                                       | 2 | 21.11 |
|     |        | K.LLGGGDEDAIRPQMQQILDFETALAN*ITIPQEK.R            | 3 | 50.12 |
|     |        | R.ACM#N*ETR.I                                     | 2 | 31.59 |
|     |        | K.HLLEN*ATASVSEAERK.A                             | 3 | 62.12 |
|     |        | R.ACMN*ETR.I                                      | 2 | 40.47 |
| 291 | Q542I8 | K.LN*FTGPGEPDSLR.C                                | 2 | 63.64 |
|     |        | R.DN*HTSCAECLK.F                                  | 2 | 34.27 |
| 292 | Q571E4 | K.TGEAN*LTQLYTQEALDFIQTQHAR.Q                     | 3 | 45.98 |
| 293 | Q5FWI3 | R.HPNCVN*VTK.W                                    | 2 | 32.58 |
|     |        | K.TTN*ASASDPR.E                                   | 2 | 61.06 |
| 294 | Q5PT54 | K.VLQVVN*VTK.T                                    | 2 | 50.3  |
| 295 | Q5SRA0 | K.CLQIQALN*MSSCPLDSR.G                            | 2 | 26.42 |
| 296 | Q5SVW9 | R.FTFTSHTPGDHQICLHSN*STR.M                        | 3 | 54.49 |
| 297 | Q60590 | R.ESQTIGDQCVYN*STHLGFQR.E                         | 3 | 39.79 |
| 298 | Q60805 | K.QPESVN*VTR.N                                    | 2 | 36.28 |
| 299 | Q60841 | R.APSN*VSTVIHILYLPEEAK.G                          | 3 | 27.06 |
| 300 | Q60I23 | -.MYNMM#ETELKPPGPQQASGGGGGGGN*ATAAATGGN*QKNSPDR.V | 4 | 22.79 |
| 301 | Q61001 | R.VFDLHQNM#GSVN*VSVGCTPAQLIETSR.A                 | 3 | 39.29 |
|     |        | R.LN*ASIADLQSK.L                                  | 2 | 59.83 |
|     |        | R.QLLAN*SSALEETILGHQGR.L                          | 3 | 69.07 |
|     |        | R.EALN*QAVN*TTR.E                                 | 2 | 23.13 |
|     |        | K.LVGGPVAGGDPN*QTIQQQYCDICTAANSNK.A               | 3 | 42.21 |

---

---

|     |        |                                     |   |       |
|-----|--------|-------------------------------------|---|-------|
|     |        | R.VFDLHQNMGSVN*VSVGCTPAQLIETSR.A    | 3 | 58.31 |
|     |        | K.QELSQDN*ATLK.A                    | 2 | 67.13 |
|     |        | R.EALNQAVN*TTR.E                    | 2 | 76.88 |
| 302 | Q61129 | R.WGEVDLIGN*CSQFYPDR.Y              | 2 | 74.29 |
|     |        | K.FSHN*GTCAAEGK.F                   | 2 | 61.56 |
|     |        | R.WGEVDLIGN*CSQFYPDRYYEK.E          | 3 | 26.88 |
|     |        | K.FN*VSLIYGR.T                      | 2 | 64.42 |
| 303 | Q61292 | R.AQAALDKAN*ASR.G                   | 2 | 72.41 |
| 304 | Q61391 | R.SCIN*ESAIDSR.G                    | 2 | 62.53 |
|     |        | K.EIAN*ATTKPEDR.N                   | 2 | 43.65 |
| 305 | Q61503 | K.VEFDDKGNVITSYGNPILLN*SSIPEDATIK.A | 3 | 48.87 |
|     |        | K.LDN*YSTQELGR.T                    | 2 | 78.92 |
|     |        | R.IKLDN*YSTQELGR.T                  | 3 | 39.24 |
| 306 | Q61526 | R.YQTVDSSNIDGFVN*CTK.I              | 2 | 135.8 |
|     |        | R.YQTVDSSN*IDGFVN*CTK.I             | 2 | 66.62 |
|     |        | R.HFN*DSGACVPR.C                    | 2 | 49.32 |
|     |        | K.NLN*VTSLGFR.S                     | 2 | 50.09 |
| 307 | Q61606 | K.LYSDQCHHN*LSLLPPPTTELVCN*R.T      | 3 | 29.18 |
|     |        | R.N*ASQCQLDDEEIEVQK.G               | 2 | 61.96 |
|     |        | K.LYSDQCHHNLSLLPPPTTELVCN*R.T       | 3 | 24.72 |
| 308 | Q61646 | K.NLFLN*HSETASAK.D                  | 2 | 84.72 |
|     |        | K.N*LFLN*HSETASAK.D                 | 2 | 51.93 |
|     |        | K.CVVHYEN*STVPEKK.N                 | 3 | 49.7  |
|     |        | K.VVLHPN*HSVVDIGLIK.L               | 2 | 68.84 |
|     |        | K.CVVHYEN*STVPEK.K                  | 3 | 51.7  |
|     |        | K.N*LTSPVGVQPILNEHTFCAGLTK.Y        | 3 | 57.18 |

---

|     |        |                                                      |   |        |
|-----|--------|------------------------------------------------------|---|--------|
| 309 | Q61735 | K.SYIFIYDGNKNSTTTDQN*FTSAK.I                         | 3 | 28.52  |
|     |        | R.DAM#VGN*YTCEVTELSR.E                               | 2 | 107.95 |
|     |        | K.SYIFIYDGNKN*STTTDQN*FTSAK.I                        | 3 | 63.91  |
|     |        | K.SYIFIYDGN*KN*STTTDQNFTSAK.I                        | 3 | 59.06  |
|     |        | K.SYIFIYDGN*KNSTTTDQN*FTSAK.I                        | 3 | 36.54  |
|     |        | R.DAMVGN*YTCEVTELSR.E                                | 2 | 82.21  |
|     |        | K.SYIFIYDGNKN*STTTDQNFTSAK.I                         | 3 | 38.82  |
| 310 | Q61830 | K.N*DTLFGIK.G                                        | 2 | 35.38  |
|     |        | K.WECKN*DTLFGIK.G                                    | 2 | 38.97  |
| 311 | Q62009 | K.GVN*ETLLVNELK.S                                    | 2 | 43.42  |
| 312 | Q62101 | R.N*SGLMDDM#DEAM#VQDTEM#ALAEGQSGGAEM#QDPDADQEDSN*R.T | 4 | 23.84  |
| 313 | Q62313 | R.RQPEKTDAELN*ETARPLSPVNP.K.L                        | 4 | 39.27  |
|     |        | K.TDAELN*ETARPLSPVNP.K.L                             | 3 | 36.14  |
| 314 | Q62351 | K.NITAFN*ETLFR.N                                     | 2 | 52.54  |
|     |        | R.QKN*ITAFN*ETLFR.N                                  | 3 | 48.5   |
|     |        | K.N*ITAFN*ETLFR.N                                    | 2 | 47.72  |
| 315 | Q62470 | R.DLAVGDDYTN*R.T                                     | 2 | 49.39  |
|     |        | R.TSIPTINMEN*K.T                                     | 2 | 27.14  |
|     |        | R.VVN*STFIEDYKDFDR.V                                 | 3 | 37.24  |
| 316 | Q63880 | K.KNVN*ISYTVN*DSFFPQRPQK.L                           | 3 | 22.52  |
|     |        | K.KNVNISYTVN*DSFFPQRPQK.L                            | 3 | 79.51  |
|     |        | K.NVN*ISYTVNDSFFPQRPQK.L                             | 2 | 90.04  |
|     |        | K.KNVN*ISYTVNDSFFPQRPQK.L                            | 4 | 23.81  |
|     |        | K.NVN*ISYTVN*DSFFPQRPQK.L                            | 2 | 25.38  |
|     |        | K.NVN*ISYTVNDSFFPQRPQK.L                             | 3 | 31.59  |
|     |        | K.NVNISYTVN*DSFFPQRPQK.L                             | 2 | 20.4   |



---

|     |        |                                 |   |       |
|-----|--------|---------------------------------|---|-------|
|     |        | K.NVNISYTVN*DSFFPQRPQK.L        | 2 | 86.74 |
|     |        | K.NVN*ISYTVNDSFFPQRPQK.L        | 2 | 62.05 |
|     |        | K.N*VN*ISYTVN*DSFFPQRPQK.L      | 2 | 21.93 |
|     |        | K.KNVN*ISYTVNDSFFPQRPQK.L       | 2 | 89.69 |
| 317 | Q63886 | R.KFPVPFQKEN*VTATLVELGR.T       | 3 | 62.81 |
|     |        | K.EN*VTATLVELGR.T               | 2 | 96.31 |
|     |        | K.FPVPFQKEN*VTATLVELGR.T        | 3 | 59.15 |
| 318 | Q64726 | R.YLN*YSR.S                     | 2 | 24.48 |
|     |        | K.DTTGSHTFQGMFGCEITNN*R.S       | 3 | 46.41 |
| 319 | Q64735 | R.IN*YTCNQGYR.L                 | 2 | 67.6  |
|     |        | K.CTPPPYVENAVM#LSEN*R.S         | 2 | 52.45 |
|     |        | K.CTPPPYVENAVMLSEN*R.S          | 3 | 41.08 |
| 320 | Q6GQT6 | K.LPEN*QTLPGELPEHAGPAEGVHDSR.A  | 4 | 34.81 |
| 321 | Q6GQT9 | R.VTNSN*AN*AAGPLIVAGYN*VSGSVR.S | 2 | 23.76 |
|     |        | R.VTNSNANAAGPLIVAGYN*VSGSVR.S   | 3 | 30.94 |
| 322 | Q6IFZ6 | R.FLEQQNQVLQTKWELLQQVN*TSTR.T   | 3 | 71.16 |
|     |        | K.WELLQQVN*TSTR.T               | 2 | 64.27 |
| 323 | Q6P5F7 | R.VWDTAAALN*R.T                 | 2 | 41.62 |
|     |        | R.VQEVLN*GTEVNLQHLTALVDCR.S     | 3 | 24.21 |
| 324 | Q6P6J9 | K.IFIFN*QTGIEAK.K               | 2 | 74.81 |
|     |        | R.N*VTGLEN*FTLK.I               | 2 | 55.84 |
| 325 | Q6PD26 | K.IYN*ASELPVR.V                 | 2 | 54.18 |
| 326 | Q6YJU1 | R.RVLYLPAYN*CTLRPVSK.R          | 3 | 38.12 |
| 327 | Q71KU9 | K.N*SSFAQYQSFK.V                | 2 | 45.22 |
|     |        | K.IDLTDFEKN*SSFAQYQSFK.V        | 3 | 36.26 |
| 328 | Q7TMM9 | K.N*SSYFVEWIPNNVK.T             | 2 | 30.72 |

---

|     |        |                             |   |        |
|-----|--------|-----------------------------|---|--------|
| 329 | Q80TL0 | R.MEN*LSPVSSGLENEQFKSRGK.T  | 3 | 33.19  |
| 330 | Q80V26 | K.QVALQTFGN*QTSIIPAGGAGYK.V | 2 | 121.79 |
| 331 | Q80X71 | R.LNN*ITNIGPLDMK.Q          | 2 | 59.79  |
|     |        | R.LNN*ITNIGPLDM#K.Q         | 2 | 52.99  |
| 332 | Q80XL7 | R.ASDAN*CSGEDAAPPEER.N      | 2 | 39.64  |
| 333 | Q80YQ1 | K.VVN*STTGPGEHLR.N          | 2 | 70.31  |
| 334 | Q80YX1 | R.LN*YSLPTGQSMEVQLPK.D      | 2 | 66.79  |
|     |        | R.LLQTAEHN*ISGAER.T         | 3 | 44.2   |
| 335 | Q8BFR4 | K.TPMTN*SSIR.F              | 2 | 40.43  |
|     |        | K.YYN*YTLSINGK.A            | 2 | 36.95  |
|     |        | R.GPGIKPN*QTSK.M            | 2 | 46.68  |
|     |        | K.TPM#TN*SSIR.F             | 2 | 29.49  |
|     |        | K.GDRN*LTWR.S               | 2 | 20.8   |
|     |        | K.YYN*YTLSIN*GK.A           | 2 | 33.51  |
| 336 | Q8BG07 | K.ELGAIHYN*CSNLAQDLEK.T     | 2 | 83.82  |
|     |        | R.N*ISVVVATHSPTLAK.T        | 2 | 37.08  |
|     |        | R.N*FSSHINR.F               | 2 | 43.28  |
| 337 | Q8BG19 | K.NLADQGN*QTAAIK.Y          | 2 | 32.3   |
| 338 | Q8BGQ4 | K.MGSYYIN*R.T               | 2 | 41.72  |
| 339 | Q8BGT0 | R.NIGN*TSEGPR.C             | 2 | 51.86  |
| 340 | Q8BH24 | K.CEVLCN*QSNKPITLTVEQSR.L   | 3 | 29.77  |
|     |        | K.CEVLCN*QSNKPITLTVEQSR.L   | 3 | 31.5   |
| 341 | Q8BHG3 | R.QGN*YSAGLPR.G             | 2 | 37.66  |
| 342 | Q8BJ83 | R.DHIHCLGN*R.T              | 2 | 23.99  |
|     |        | R.YFAN*CTVR.D               | 2 | 35.02  |
| 343 | Q8BJS4 | K.ALSPN*STISSAPK.D          | 2 | 47.82  |

|     |        |                                               |   |       |
|-----|--------|-----------------------------------------------|---|-------|
| 344 | Q8BJU2 | R.N*STTPLWR.T                                 | 2 | 45.87 |
| 345 | Q8BM88 | R.YPAEGQRPIPN*VSLPLR.F                        | 3 | 32.73 |
| 346 | Q8BQ46 | R.DYGPRPDADSESDNSDN*N*TIFVQGLGEGVSTDQVGEFFK.Q | 3 | 24.43 |
| 347 | Q8BRK9 | K.NLGFN*CTTSQGK.L                             | 2 | 36.13 |
| 348 | Q8BTJ4 | R.LIDLSCIDRSN*YSVIDLTPVAAILPK.I               | 3 | 22.56 |
|     |        | K.IN*VTEVYDK.L                                | 2 | 58.94 |
|     |        | R.SN*YSVIDLTPVAAILPK.I                        | 2 | 58.18 |
| 349 | Q8BWT1 | K.DGTVTAGN*ASGVSDGAGAVIIASEDAVKK.H            | 3 | 56.61 |
|     |        | K.DGTVTAGN*ASGVSDGAGAVIIASEDAVK.K             | 2 | 59.78 |
| 350 | Q8BXA5 | K.DLM#VIN*R.S                                 | 2 | 29.7  |
|     |        | R.TVN*VSVPK.K                                 | 2 | 43.34 |
|     |        | K.DLMVIN*R.S                                  | 2 | 27.61 |
| 351 | Q8BXZ1 | K.N*TSLEHTR.L                                 | 2 | 43.07 |
|     |        | K.LVAIAVIDEKN*TSLEHTR.L                       | 3 | 39.73 |
| 352 | Q8BY89 | R.KTCNPETFPLRN*ESLQCPTAR.C                    | 3 | 25.36 |
|     |        | R.KTCNPETFPLRN*ESLQCPTAR.C                    | 3 | 26.47 |
|     |        | K.TCNPETFPLRN*ESLQCPTAR.C                     | 3 | 34.61 |
|     |        | R.KN*ITDLVEGAK.K                              | 2 | 45.61 |
| 353 | Q8C0Z1 | K.N*TN*SSN*NLTR.S                             | 2 | 35.5  |
|     |        | R.KPILGHYKPDTLAVVIEN*GTSIDR.Q                 | 4 | 37.17 |
|     |        | K.NTN*SSNN*LTR.S                              | 2 | 72.12 |
|     |        | K.N*TN*SSNN*LTR.S                             | 2 | 39.23 |
| 354 | Q8C129 | R.DIILHSTGHN*ISR.V                            | 3 | 39.82 |
| 355 | Q8C165 | R.HYAN*ITN*GMYR.F                             | 2 | 56.43 |
|     |        | R.HYAN*ITNGMYR.F                              | 2 | 53.94 |
|     |        | R.HYAN*ITN*GM#YR.F                            | 2 | 47.65 |

---

|     |          |                                                  |   |       |
|-----|----------|--------------------------------------------------|---|-------|
|     |          | K.GAIQIPTVSFSHEESN*TTALAEFGYIR.K                 | 3 | 53.4  |
|     |          | K.GALDLMLQVN*M#TPGHSSAPPK.E                      | 3 | 59.11 |
|     |          | R.HYAN*ITNGM#YR.F                                | 2 | 53.48 |
|     |          | K.GAIQIPTVSFSHEESN*TTALAEFGYIR.K                 | 3 | 43.02 |
| 356 | Q8C6K9-2 | R.DLSVFAPN*MTEIHK.D                              | 2 | 25.79 |
|     |          | R.VGLVTYSN*ETR.V                                 | 2 | 56.95 |
|     |          | R.DLSVFAPN*M#TEIHK.D                             | 2 | 21.94 |
|     |          | K.LGN*FSELATHNQFLK.K                             | 3 | 20.09 |
|     |          | K.LGNFSELATHN*QTFLK.K                            | 3 | 41.19 |
|     |          | K.LGN*FSELATHN*QTFLK.K                           | 3 | 31    |
| 357 | Q8CDV7   | K.WPAEKEN*DTGVVQLEECQVK.G                        | 3 | 45.81 |
|     |          | K.VVN*VSELYGTPCTK.R                              | 2 | 75.94 |
| 358 | Q8CFG9   | R.CN*YSIR.V                                      | 2 | 37.25 |
| 359 | Q8CHT0   | R.EAGLPPNIIQFVPADGPTFGDTVTSSEHLCGIN*FTGSVPTFK.H  | 3 | 48.84 |
|     |          | R.EAGLPPN*IIQFVPADGPTFGDTVTSSEHLCGIN*FTGSVPTFK.H | 3 | 25.29 |
| 360 | Q8CID3   | R.DLGTASHN*FSGALPR.V                             | 2 | 34.97 |
| 361 | Q8CIF4   | K.GHLIIAQVATNPQGLTGTGN*TTSEMDPSHRK.F             | 4 | 23.8  |
|     |          | K.GHLIIAQVATNPQGLTGTGN*TTSEM#DPSHR.K             | 4 | 27.63 |
|     |          | K.GVQIIVFPEDGIHGFN*FTR.T                         | 3 | 41.8  |
|     |          | R.FN*DTEVLQR.L                                   | 2 | 68.01 |
| 362 | Q8CJH3   | K.YTSDPN*VTSVGPSK.S                              | 2 | 54.64 |
|     |          | R.VVAVSPAN*ISR.E                                 | 2 | 22.64 |
| 363 | Q8JZZ0   | R.VSQVLHEGGHN*VTK.L                              | 3 | 44.87 |
| 364 | Q8JZZ7   | K.GPDLSN*CTSHWVNQLAQK.I                          | 3 | 23.38 |
|     |          | R.SLGQFLSTEN*ATIK.L                              | 2 | 39.16 |
| 365 | Q8K0B2   | K.GN*STLAVPK.R                                   | 2 | 38.37 |

---

|     |        |                                |   |        |
|-----|--------|--------------------------------|---|--------|
| 366 | Q8K0E8 | K.YKGTAGNALMDGASQLVGEN*R.T     | 2 | 110.3  |
|     |        | K.GTAGNALM#DGASQLVGEN*R.T      | 2 | 109.57 |
|     |        | K.GTAGN*ALM#DGASQLVGEN*R.T     | 2 | 34.15  |
|     |        | K.YKGTAGNALM#DGASQLVGEN*R.T    | 2 | 90.24  |
|     |        | K.GTAGN*ALMDGASQLVGEN*R.T      | 2 | 76.87  |
|     |        | K.YKGTAGN*ALMDGASQLVGEN*R.T    | 2 | 41.32  |
|     |        | K.GTAGNALMDGASQLVGEN*R.T       | 2 | 100    |
|     |        | K.GTAGNALMDGASQLVGEN*R.T       | 2 | 43.94  |
|     |        | K.GTAGN*ALM#DGASQLVGEN*R.T     | 2 | 38.71  |
| 367 | Q8K0L2 | R.QSLNTVN*DTVWK.F              | 2 | 56.37  |
|     |        | R.SLFN*FSSCK.G                 | 2 | 36.14  |
| 368 | Q8K0R6 | R.AAGVLEDVYN*R.T               | 2 | 64.48  |
|     |        | R.AAGVLEDVYN*RTQGLLAGHGLLQLA.- | 3 | 38.15  |
| 369 | Q8K2C7 | R.YHSQTYGN*GSK.C               | 2 | 38.6   |
| 370 | Q8K385 | R.HSQPLITYEKYN*VTDTPK.S        | 3 | 46.05  |
|     |        | K.YN*VTDTPK.S                  | 2 | 33.2   |
| 371 | Q8K4Q8 | K.VQSLQTLAAN*NSALAK.A          | 2 | 75.74  |
|     |        | K.DLQDLHKDTEN*R.T              | 3 | 40.54  |
|     |        | R.HTDDLTSLN*NTLVNIR.L          | 2 | 44.82  |
| 372 | Q8QZR3 | K.TVAN*LSGCEATDSEALIHCLR.A     | 2 | 111.94 |
| 373 | Q8R084 | K.WVGN*WTYELKK.L               | 3 | 31.1   |
|     |        | K.WVGN*WTYELK.K                | 2 | 52.76  |
| 374 | Q8R0T6 | K.SLFGALPGN*R.S                | 2 | 50.02  |
| 375 | Q8R143 | R.VGCSEYTN*R.S                 | 2 | 68.73  |
| 376 | Q8R180 | K.WGHN*VTEFQQR.F               | 2 | 45.04  |
| 377 | Q8R2E9 | K.LGAIN*STLSNESK.E             | 2 | 58.51  |

|     |        |                                  |   |       |
|-----|--------|----------------------------------|---|-------|
| 378 | Q8R2Q8 | R.N*TTHLLQR.Q                    | 2 | 53.38 |
| 379 | Q8R2R1 | R.N*LSFMAR.F                     | 2 | 23.18 |
|     |        | R.FVHVN*TSAILK.L                 | 3 | 59.43 |
| 380 | Q8R2S8 | R.HGDLCNDVN*STK.I                | 2 | 50.51 |
| 381 | Q8R3G9 | R.ILN*ETLYENAK.L                 | 2 | 82.07 |
| 382 | Q8R3H7 | R.YHVLHIN*TTK.N                  | 3 | 25.43 |
| 383 | Q8R4U0 | R.VLLN*LTTVAANHGYTK.F            | 2 | 63.09 |
|     |        | R.CDNN*DTIIVR.G                  | 2 | 76.5  |
|     |        | R.YGPQCN*R.T                     | 2 | 33.81 |
|     |        | K.NAN*CSTVSPGQTQCTCQK.G          | 2 | 52.29 |
|     |        | R.DIEHHLTN*VN*VSFYDDLVDN*GTVLK.T | 3 | 28.57 |
|     |        | R.DIEHHLTN*VNVSFYDDLVDN*GTVLK.T  | 3 | 20.33 |
|     |        | R.DIEHHLTNVN*VSFYDDLVDN*GTVLK.T  | 3 | 23.46 |
|     |        | K.ITN*GTVGVR.D                   | 2 | 69.54 |
| 384 | Q8VBZ3 | K.DYYPIN*ESLASPLR.V              | 2 | 92.18 |
| 385 | Q8VCC2 | K.TAASILWQAYPILN*ISEK.L          | 2 | 59.06 |
| 386 | Q8VCG4 | R.EAN*LTEDQILFFPK.Y              | 2 | 85.49 |
|     |        | R.SLPVN*DSVLDVFER.R              | 2 | 62.2  |
| 387 | Q8VCI0 | R.DQGN*VTDM#ASMK.Y               | 2 | 50.13 |
|     |        | K.NGDAYGYYN*DSIK.T               | 2 | 52.19 |
|     |        | R.DQGN*VTDM#ASM#K.Y              | 2 | 62.85 |
|     |        | K.N*GDAYGYYN*DSIK.T              | 2 | 21.47 |
|     |        | R.FN*ETLHR.G                     | 2 | 46.05 |
|     |        | R.DQGN*VTDMASMK.Y                | 2 | 70.26 |
|     |        | R.DQGN*VTDMASM#K.Y               | 2 | 72.78 |
| 388 | Q8VCP9 | K.YQFEVLCAPRPGAASN*LSFQAPFR.L    | 3 | 27.83 |

|     |        |                                         |   |       |
|-----|--------|-----------------------------------------|---|-------|
| 389 | Q8VCS0 | K.N*SSTHNSLHQR.L                        | 3 | 47.25 |
|     |        | K.APSHN*TTEPDPHLSPELQALISEVAQHVDVQNGR.E | 5 | 24.55 |
|     |        | K.LEPEHLQLQN*ISQEQLAQVATLTK.E           | 3 | 38.62 |
| 390 | Q8VCT4 | K.DGASEEETN*LSK.M                       | 2 | 38.74 |
| 391 | Q8VCU1 | K.NVNISYIVN*DSFFPQRPEK.L                | 2 | 78.99 |
|     |        | K.NVN*ISYIVNDSFFPQRPEK.L                | 2 | 87.85 |
|     |        | K.N*VN*ISYIVN*DSFFPQRPEK.L              | 2 | 53.05 |
|     |        | K.NVN*ISYIVNDSFFPQRPEK.L                | 3 | 28.39 |
|     |        | K.NVN*ISYIVN*DSFFPQRPEK.L               | 3 | 51.71 |
| 392 | Q8VCU2 | R.LSSSPN*VTISCK.D                       | 2 | 59.84 |
|     |        | R.KNLN*YTER.G                           | 2 | 39.61 |
|     |        | K.NLN*YTER.G                            | 2 | 24.93 |
| 393 | Q8VCW4 | K.SQGILN*GFN*K.T                        | 2 | 23.08 |
|     |        | K.SQGILNGFN*K.T                         | 2 | 42.72 |
| 394 | Q8VD31 | R.AGN*ASLTLPNLTK.D                      | 2 | 50.86 |
| 395 | Q8VHI3 | R.SQHLN*STDAADK.M                       | 3 | 43.18 |
| 396 | Q91V08 | K.WTDNTEYN*NTIPR.G                      | 2 | 71.09 |
|     |        | K.TEQIPVN*K.T                           | 2 | 24.11 |
| 397 | Q91WP0 | R.GDSGGALVFLDN*ETQR.W                   | 2 | 66.92 |
| 398 | Q91WU0 | K.N*ATTYPPMCSQDAAR.G                    | 3 | 74.31 |
|     |        | K.N*ATTYPPM#CSQDAAR.G                   | 2 | 61.37 |
| 399 | Q91X72 | R.N*GTAHGN*STHPMHSR.C                   | 3 | 48.99 |
|     |        | R.SWSTVGN*CTAALR.W                      | 2 | 68.4  |
|     |        | R.N*GTAHGN*STHPM#HSR.C                  | 2 | 65.23 |
| 400 | Q91XA2 | K.AVLVNN*ITTGEK.L                       | 2 | 49.16 |
| 401 | Q91XD7 | R.N*SSHLVCSACFGPCAR.C                   | 3 | 23.71 |

|     |        |                                      |   |       |
|-----|--------|--------------------------------------|---|-------|
| 402 | Q91XL1 | K.MFSQN*DTR.C                        | 2 | 41.12 |
| 403 | Q91Y47 | K.GMNYN*SSVVK.N                      | 2 | 44.68 |
|     |        | K.GM#NYN*SSVVK.N                     | 2 | 37.49 |
| 404 | Q91Y74 | R.N*SSLGGVINK.Y                      | 2 | 45.93 |
| 405 | Q91YQ5 | R.DEIGN*VSTSHLLILDDSVEM#EIRPR.F      | 3 | 57.27 |
| 406 | Q91ZX7 | R.VDIPQQPMGIIAVAN*DTN*SCELSPCR.I     | 2 | 35.4  |
|     |        | R.KLNLDGSN*YTLLK.Q                   | 2 | 79.47 |
|     |        | R.IETILLN*GTDR.K                     | 2 | 67.34 |
|     |        | K.LTSCATN*ASM#CGDEAR.C               | 2 | 91.93 |
|     |        | K.DN*TTCYEFK.K                       | 2 | 38.85 |
|     |        | R.AFIN*GTGVETVVSADLPN*AHGLAVDWVSR.N  | 3 | 82.03 |
|     |        | K.RGCKDN*ATDSVPLR.T                  | 3 | 35.49 |
|     |        | R.IETILLN*GTDRK.I                    | 2 | 35.75 |
|     |        | R.CRDGSCIGN*SSR.C                    | 3 | 22.88 |
|     |        | R.LN*GTDPIVAADSK.R                   | 2 | 88.11 |
|     |        | R.VDIPQQPM#GIIAVAN*DTNSCELSPCR.I     | 3 | 33.21 |
|     |        | R.WLCDGDKDCTDGADESVTAGCLYN*STCDDR.E  | 3 | 83.58 |
|     |        | K.LTSCATN*ASMCDEAR.C                 | 2 | 115.5 |
|     |        | K.DN*ATDSVPLR.T                      | 2 | 58.08 |
|     |        | R.AFIN*GTGVETVVSADLPNAHGLAVDWVSR.N   | 3 | 89.83 |
|     |        | K.LYWISSGN*HTINR.C                   | 2 | 60.51 |
|     |        | R.CDM#DGQN*R.T                       | 2 | 59.8  |
|     |        | R.GPCSHLCLINYN*R.T                   | 3 | 43.03 |
|     |        | R.VWVCDRDNDCVDGSDEPAN*CTQMTCGVDEFR.C | 3 | 56.5  |
|     |        | R.M#HLN*GSNVQVLHR.T                  | 3 | 36.2  |
|     |        | R.VWVCDRDNDCVDGSDEPAN*CTQMTCGVDEFR.C | 3 | 47.24 |



---

|     |        |                                             |   |       |
|-----|--------|---------------------------------------------|---|-------|
|     |        | K.CN*ASSQFLCSSGR.C                          | 2 | 63.56 |
|     |        | R.FN*STEYQVVTR.V                            | 2 | 77.25 |
|     |        | R.VWVCDRDN*DCVDGSDEPAN*CTQMTCGVDEFR.C       | 4 | 23.48 |
|     |        | R.MHLN*GSNVQVLHR.T                          | 2 | 56.93 |
|     |        | R.GVTHLN*ISGLK.M                            | 2 | 63.73 |
|     |        | R.FGTCSQLCN*NTK.G                           | 2 | 70.13 |
|     |        | R.DGSCIGN*SSR.C                             | 2 | 65.62 |
|     |        | R.VWVCDRDN*DCVDGSDEPAN*CTQMTCGVDEFR.C       | 3 | 37.33 |
|     |        | R.CDMDGQN*R.T                               | 2 | 60.3  |
|     |        | R.WLCDGDKDCTDGADESVTAGCLYN*STCDDREFMCQN*R.L | 4 | 44.12 |
|     |        | R.VDIPQQPMGIIAVAN*DTNSCELSPCR.I             | 2 | 62.18 |
|     |        | R.WLCDGDNDGCGNSEDESN*ATCSAR.T               | 2 | 83.38 |
|     |        | K.WTGHN*VTVVQR.T                            | 2 | 66.58 |
|     |        | R.GCKDN*ATDSVPLR.T                          | 3 | 35.01 |
|     |        | R.LN*GTDPIVAADSKR.G                         | 2 | 54.1  |
|     |        | R.VNRFN*STEYQVVTR.V                         | 2 | 52.99 |
|     |        | R.WLCDGDKDCTDGADESVTAGCLYN*STCDDREFMCQNR.L  | 4 | 45.94 |
|     |        | K.QTGDVTCN*CTDGR.V                          | 2 | 71.31 |
|     |        | R.VWVCDRDN*DCVDGSDEPAN*CTQM#TCGVDEFR.C      | 3 | 49.7  |
|     |        | R.VWVCDRDNDGVDGSDEPAN*CTQM#TCGVDEFR.C       | 3 | 54.41 |
| 407 | Q92111 | K.FDEFFSQGCAPGYEKN*STLCDLCIGPLK.C           | 2 | 28.59 |
|     |        | K.FDEFFSQGCAPGYEKN*STLCDLCIGPLK.C           | 3 | 78.68 |
|     |        | K.N*STLCDLCIGPLK.C                          | 2 | 73.91 |
| 408 | Q923B6 | R.LRN*ATITQALTNK.D                          | 2 | 48.14 |
| 409 | Q925P3 | R.TLTLN*VTRN*DTGPYVCETR.N                   | 3 | 65.47 |
|     |        | R.N*DTGPYVCETR.N                            | 2 | 68.49 |

---

---

|     |        |                                  |   |        |
|-----|--------|----------------------------------|---|--------|
|     |        | K.N*ITVLEPVTQPFLQVTN*TTVK.E      | 2 | 59.34  |
|     |        | K.NITVLEPVTQPFLQVTN*TTVK.E       | 2 | 50.83  |
|     |        | R.MTLSQN*NSILR.I                 | 2 | 82.25  |
|     |        | R.TLTLN*VTR.N                    | 2 | 65.44  |
|     |        | K.NITVLEPVTQPFLQVTN*TTVK.E       | 3 | 65.19  |
|     |        | K.GN*TTAIDK.E                    | 2 | 61.51  |
|     |        | K.N*ITVLEPVTQPFLQVTN*TTVK.E      | 3 | 21.04  |
|     |        | R.MTLSQN*N*SILR.I                | 2 | 38.65  |
|     |        | K.N*ITVLEPVTQPFLQVTNTTVK.E       | 2 | 38.54  |
|     |        | R.M#TSLQN*NSILR.I                | 2 | 72.52  |
|     |        | K.GN*TTAIDKEIAR.F                | 2 | 67.77  |
| 410 | Q99J21 | R.GHVDPAN*DTFDIDPR.V             | 3 | 33.48  |
| 411 | Q99JY8 | R.LRPHFLSVCDPDFSQIN*CSEGYIQNYR.C | 4 | 39.98  |
|     |        | R.LRPHFLSVCDPDFSQIN*CSEGYIQNYR.C | 3 | 27.89  |
| 412 | Q99K41 | R.LEDRFN*STLGPSEEQEKNWPGGPGR.L   | 4 | 29.9   |
|     |        | R.LEKLEGLLAN*VSR.E               | 3 | 35.47  |
|     |        | K.LEGLLAN*VSR.E                  | 2 | 69.06  |
|     |        | R.ESN*STSLTQAALLEK.L             | 2 | 106.89 |
|     |        | R.FN*STLGPSEEQEK.N               | 2 | 36.53  |
|     |        | R.RLGALN*NSLLLLLEDR.L            | 3 | 32.66  |
|     |        | R.LN*LTAQLSQLEGLLQAR.G           | 3 | 70.53  |
|     |        | R.LGALN*NSLLLLLEDR.L             | 2 | 117.78 |
|     |        | R.LEDRFN*STLGPSEEQEK.N           | 3 | 50.97  |
| 413 | Q99KF1 | R.FTFTSHTPGEHQICLHSN*STK.F       | 3 | 71.05  |
| 414 | Q99KW9 | K.NMTILN*R.T                     | 2 | 20.52  |
|     |        | K.N*MTILN*R.T                    | 2 | 36.87  |

---

|     |        |                                             |   |       |
|-----|--------|---------------------------------------------|---|-------|
|     |        | K.N*TSGSN*QQAFLLENVPCNN*ASCEEVHR.M          | 3 | 57.18 |
| 415 | Q99MQ4 | R.ITDIEN*GTFANIPR.V                         | 2 | 87.35 |
| 416 | Q9CPW5 | K.AGYFN*FTSATITYLAQEDGPVVIGSTSAPGQGGILAQR.E | 4 | 28.9  |
|     |        | K.AGYFN*FTSATITYLAQEDGPVVIGSTSAPGQGGILAQR.E | 4 | 62.49 |
|     |        | R.IAPASN*VSHTVVLRLK.A                       | 2 | 76.6  |
|     |        | K.AGYFN*FTSATITYLAQEDGPVVIGSTSAPGQGGILAQR.E | 4 | 30.47 |
| 417 | Q9CQ01 | R.N*CTEPGQLSSR.Q                            | 2 | 37.5  |
| 418 | Q9CQW3 | K.CSLLHSN*ISVK.A                            | 3 | 40.32 |
| 419 | Q9CR23 | R.N*ISGHIYNQN*VSQK.D                        | 2 | 39.02 |
| 420 | Q9CRA0 | K.N*GSLCYK.V                                | 2 | 32.21 |
| 421 | Q9CY50 | R.YPQDYQFYIQN*FTALPLNTVVPPQR.Q              | 2 | 60.17 |
|     |        | K.DLNGN*VFQDAVFN*QTVTVIER.E                 | 3 | 21.41 |
|     |        | K.DLNGN*VFQDAVFN*QTVTVIER.E                 | 2 | 36.62 |
|     |        | K.DLN*GNVFQDAVFN*QTVTVIER.E                 | 3 | 23.45 |
|     |        | K.DLNGN*VFQDAVFN*QTVTVIER.E                 | 3 | 24.15 |
|     |        | K.DLNGNVFQDAVFN*QTVTVIER.E                  | 2 | 80.53 |
|     |        | K.DLNGNVFQDAVFN*QTVTVIER.E                  | 3 | 50.34 |
| 422 | Q9CYA0 | R.N*ETHSICSACDESCK.T                        | 2 | 71.26 |
| 423 | Q9D136 | R.FVFM#EEGSN*K.T                            | 2 | 36.06 |
|     |        | R.FVFMEEGSN*K.T                             | 2 | 39.94 |
| 424 | Q9D1H9 | R.VDLEDFEN*NTAYAK.Y                         | 2 | 71.66 |
|     |        | R.FN*GSVSFFR.G                              | 2 | 61.89 |
|     |        | K.RFN*GSVSFFR.G                             | 2 | 26.71 |
| 425 | Q9D7N9 | R.AGPN*GTLFVVDAYK.G                         | 2 | 92.73 |
| 426 | Q9DAU1 | K.VVMDIPYELWN*ETSAEVADLKK.Q                 | 4 | 33.86 |
| 427 | Q9DBB9 | R.LQLLN*LSR.N                               | 2 | 40.52 |

|     |        |                                            |   |       |
|-----|--------|--------------------------------------------|---|-------|
|     |        | R.AFSGSPN*LTK.V                            | 2 | 32.76 |
|     |        | R.LQDLEITGSPVSN*LSAHIFSN*LSSLEK.L          | 3 | 57.33 |
| 428 | Q9DBI0 | R.ELLVDELLSN*SSTLASYSK.T                   | 2 | 57.72 |
| 429 | Q9DBX3 | R.MPN*GTQAR.G                              | 2 | 45.4  |
| 430 | Q9EP52 | R.N*YSDTPPTSK.S                            | 2 | 29.29 |
| 431 | Q9EPK6 | K.FN*SSSSSLEEK.V                           | 2 | 56.55 |
|     |        | R.LINKFN*SSSSSLEEK.V                       | 3 | 23.84 |
| 432 | Q9EQG7 | K.IHDSFPTYYPYN*ESVSFEDR.V                  | 3 | 28.32 |
|     |        | R.VQPIVAVADEGWYILQN*K.S                    | 3 | 56.1  |
| 433 | Q9EQH2 | K.CFNAMEVDALN*SSHPVSTPVENPAQIR.E           | 3 | 68.18 |
|     |        | K.CFN*AM#EVDALN*SSHPVSTPVEN*PAQIR.E        | 3 | 50.49 |
|     |        | K.CFNAM#EVDALN*SSHPVSTPVENPAQIR.E          | 3 | 70.35 |
|     |        | K.CFNAM#EVDALN*SSHPVSTPVEN*PAQIR.E         | 3 | 44.97 |
|     |        | K.EN*GSQLR.C                               | 2 | 22.85 |
|     |        | K.CFN*AM#EVDALN*SSHPVSTPVENPAQIR.E         | 3 | 39.16 |
|     |        | K.CFNAM#EVDALN*SSHPVSTPVEN*PAQIR.E         | 3 | 28.98 |
| 434 | Q9ER39 | R.GN*VSACAR.S                              | 2 | 48.04 |
| 435 | Q9ESB3 | R.LQEGALPQLPPGYPPHSGAN*R.T                 | 3 | 53.23 |
|     |        | R.N*CSTQHFR.S                              | 2 | 59.43 |
|     |        | R.LPPLNIGEVLTLPEANFPSFSLPNCN*R.S           | 3 | 23.99 |
| 436 | Q9ET22 | R.ALAGLVYN*SSGTEPCYDIYR.L                  | 2 | 100.7 |
| 437 | Q9ET30 | R.IVDVN*LTSEGK.V                           | 2 | 72.38 |
| 438 | Q9JHE3 | K.AIATDTVAN*MSSGPEPPFFK.N                  | 2 | 35.43 |
| 439 | Q9JHJ3 | R.LLEFDSTN*ASEGAQPPGKPYPPYSLAK.F           | 3 | 75.67 |
| 440 | Q9JL3  | R.YATENDISSLHN*STLTCLVN*QTSLTGTSPPEIM#EK.G | 3 | 44.61 |
|     |        | R.YATENDISSLHN*STLTCLVNQTSLTGTSPPEIM#EK.G  | 3 | 84    |

---

|     |        |                                                      |   |        |
|-----|--------|------------------------------------------------------|---|--------|
|     |        | R.YATENDISSLHN*STLTCLVN*QTSLTGTSPEIM#EK.G            | 3 | 31.45  |
|     |        | R.YATEN*DISSLHNSTLTCLVN*QTSLTGTSPEIM#EK.G            | 3 | 52.6   |
|     |        | R.YATENDISSLHN*STLTCLVN*QTSLTGTSPEIMEK.G             | 3 | 62.81  |
|     |        | R.YATEN*DISSLHN*STLTCLVNQTSLTGTSPEIM#EK.G            | 3 | 56.19  |
|     |        | R.YATENDISSLHNSTLTCLVN*QTSLTGTSPEIMEK.G              | 3 | 23.9   |
|     |        | R.YATEN*DISSLHN*STLTCLVNQTSLTGTSPEIMEK.G             | 4 | 51.22  |
|     |        | R.YATENDISSLHN*STLTCLVNQTSLTGTSPEIMEK.G              | 3 | 34.37  |
|     |        | R.YATEN*DISSLHN*STLTCLVN*QTSLTGTSPEIM#EK.G           | 3 | 43.4   |
|     |        | R.YATENDISSLHN*STLTCLVN*QTSLTGTSPEIMEK.G             | 4 | 27.3   |
|     |        | R.YATENDISSLHNSTLTCLVN*QTSLTGTSPEIM#EK.G             | 3 | 61.7   |
|     |        | R.YATEN*DISSLHN*STLTCLVNQTSLTGTSPEIM#EK.G            | 3 | 48.81  |
| 441 | Q9JK53 | R.IHYLYLQNNFITELPLESFQN*ATGLR.W                      | 3 | 32.9   |
|     |        | K.IN*GTQICPN*N*LVAFHDFSSDLENVPHLR.Y                  | 4 | 24.42  |
| 442 | Q9JKF6 | R.NPN*GTVTVISR.Y                                     | 2 | 53.05  |
| 443 | Q9JKR6 | K.VIN*DTWAWK.N                                       | 2 | 68.78  |
|     |        | K.EN*GTDAVQEEEESPAEGSKDEPAEQGELK.E                   | 3 | 81.63  |
|     |        | R.LSALDNLLN*HSSIFLK.G                                | 2 | 84.83  |
|     |        | K.LGNTISSLFGGGTSSDAKEN*GTDAVQEEEESPAEGSKDEPAEQGELK.E | 4 | 41.82  |
|     |        | K.LGNTISSLFGGGTSSDAKEN*GTDAVQEEEESPAEGSKDEPAEQGELK.E | 4 | 23.54  |
|     |        | R.VFGSQN*LTTVK.L                                     | 2 | 78.22  |
|     |        | K.LGNTISSLFGGGTSSDAKEN*GTDAVQEEEESPAEGSK.D           | 3 | 113.33 |
|     |        | K.EN*GTDAVQEEEESPAEGSKDEPAEQGELK.E                   | 3 | 97.09  |
|     |        | K.N*ATLAEQAK.L                                       | 2 | 46.89  |
|     |        | K.LGN*TISSLFGGGTSSDAKEN*GTDAVQEEEESPAEGSK.D          | 3 | 85.87  |
|     |        | K.EN*GTDAVQEEEESPAEGSKDEPAEQGELK.E                   | 3 | 85.4   |
|     |        | R.AEPPLN*ASAGDQEEK.V                                 | 2 | 75.18  |

---

|     |        |                                |   |       |
|-----|--------|--------------------------------|---|-------|
|     |        | K.EN*GTDAVQEEEESPAEGSK.D       | 2 | 79.15 |
| 444 | Q9JL99 | K.QYCTEQN*ATLVK.T              | 2 | 39.78 |
|     |        | R.RN*LTWEESK.Q                 | 2 | 42.62 |
| 445 | Q9QUN9 | K.GGN*GTICDNQR.D               | 2 | 27.34 |
| 446 | Q9QUT0 | K.N*ASHQNASQQGN*TSSSAK.K       | 2 | 75.91 |
| 447 | Q9QWK4 | R.LENN*CTHGEDTWMECEDPFELK.L    | 3 | 28.19 |
| 448 | Q9QWR8 | K.VN*YTEVSR.V                  | 2 | 50.8  |
| 449 | Q9QY81 | R.GLM#VGN*GSVLGVVQAVDAETGK.V   | 3 | 43.6  |
|     |        | R.IEAVLPAEFFEVLSSSQN*GSYHHIR.A | 4 | 66.43 |
|     |        | R.GLMVGN*GSVLGVVQAVDAETGK.V    | 2 | 52.13 |
|     |        | R.DDFVQIGKGATN*NTCIIR.T        | 3 | 24.88 |
|     |        | K.GATN*NTCIIR.T                | 2 | 60.34 |
| 450 | Q9QYC7 | K.VEN*GSETGPLPELQPLLEGEVK.G    | 2 | 52.43 |
|     |        | K.EKVEN*GSETGPLPELQPLLEGEVK.G  | 2 | 55.1  |
| 451 | Q9QZ25 | K.LTGSAGN*YTVCQK.D             | 2 | 50.27 |
| 452 | Q9QZC2 | K.QFN*CSFEN*ITR.N              | 2 | 34.2  |
|     |        | R.FN*FTNCASLK.E                | 2 | 23.72 |
|     |        | K.QFNCSFEN*ITR.N               | 2 | 40.49 |
| 453 | Q9R013 | R.N*ATFSSFLPLLDKDPLPQDFSVK.M   | 3 | 24.65 |
|     |        | K.VYIN*DSVELSR.N               | 2 | 46.48 |
| 454 | Q9R069 | K.GN*LTLER.V                   | 2 | 39.66 |
| 455 | Q9R098 | R.FCNIVPTEHCFLGN*GTEYR.G       | 3 | 32.96 |
| 456 | Q9R0E2 | R.YN*CSVR.A                    | 2 | 28.13 |
| 457 | Q9R0L9 | K.TYCANEPLSN*CSQVN*R.T         | 2 | 90.63 |
|     |        | K.TYCANEPLSN*CSQVNR.T          | 2 | 21.16 |
|     |        | K.TYCANEPLSNCSQVN*R.T          | 2 | 21.26 |

---

|     |        |                              |   |       |
|-----|--------|------------------------------|---|-------|
|     |        | K.TYCANEPLSN*CSQVNR.T        | 2 | 28.65 |
| 458 | Q9R1W5 | K.IM#QDPIQQAEGLYCN*R.T       | 2 | 39.89 |
|     |        | K.IM#QDPIQQAEGLYCN*R.T       | 2 | 65.22 |
| 459 | Q9WTR5 | K.IN*NTHALVSLLQNLNK.A        | 3 | 62.5  |
| 460 | Q9WU60 | K.IDSTGN*VTNELR.V            | 2 | 66.08 |
|     |        | R.EWLPLN*HSVNSVVVR.Y         | 3 | 26.24 |
|     |        | R.GICN*ASDTR.G               | 2 | 52.15 |
| 461 | Q9WUH7 | K.GQTQN*YSTLLLEEASER.L       | 2 | 52.88 |
|     |        | K.GQTQN*YSTLLLEEASER.L       | 2 | 71.14 |
|     |        | R.GYN*SSQDLPSLVDFVK.L        | 2 | 71.18 |
| 462 | Q9WV54 | K.N*LSFATIYDVLSTKPVLNK.L     | 3 | 25.65 |
|     |        | R.SVLEN*TTSYEEAK.N           | 2 | 72.38 |
| 463 | Q9WV91 | K.LEN*WTDASR.V               | 2 | 37.45 |
|     |        | R.YSVLITAEKPVGDLSSPN*ETK.Y   | 3 | 40.92 |
| 464 | Q9WVJ3 | K.EVM#NLLQPLN*VTK.V          | 2 | 46.07 |
|     |        | K.EVMNLLQPLN*VTK.V           | 2 | 76.94 |
| 465 | Q9WVL3 | K.TAFAPPDIPVCLLGN*R.T        | 2 | 38.68 |
| 466 | Q9Z0K8 | K.KPCN*TSDSHCPPDGR.F         | 3 | 20.48 |
| 467 | Q9Z0M5 | K.NYFHYN*QSFPPSYN*IK.N       | 2 | 21.44 |
|     |        | K.NYFHYN*QSFPPSYNIK.N        | 2 | 57.44 |
|     |        | K.NYFHYN*QSFPPSYNIK.N        | 2 | 36.02 |
| 468 | Q9Z247 | R.YHYN*GTFLDGTFLDSSHNR.M     | 3 | 36.25 |
| 469 | Q9Z2A9 | R.LWDPSSHPIQN*ISR.D          | 2 | 55.16 |
|     |        | R.QLFFN*GTETLR.S             | 2 | 48.76 |
| 470 | Q9Z329 | K.EN*CSPTIPSSNTAGEEGEDGIER.T | 2 | 41.86 |
| 471 | S4R1M0 | K.SLPNN*VTSFEVESLKPYP.Y      | 2 | 48.65 |

---

---

|     |        |                                |   |       |
|-----|--------|--------------------------------|---|-------|
|     |        | K.TSRPTDNSIN*VTCGPPYETNGPK.T   | 3 | 52.76 |
|     |        | K.TSRPTDNSIN*VTCGPPYETN*GPK.T  | 3 | 36.21 |
| 472 | S4R204 | R.HVCPVENWSYN*ESCSPDPAEQGGPK.S | 3 | 77.58 |
| 473 | S4R257 | K.IVSN*ASCTTNCLAPLAK.V         | 2 | 35.14 |
| 474 | Z4YJW0 | R.FINYN*QTVSR.M                | 2 | 50.78 |
| 475 | Z4YLN2 | R.MNDAPTSYGYSADVGN*K.T         | 2 | 70.23 |
| 476 | Z4YML9 | R.N*ISSQEGSTDVVAR.T            | 2 | 30.37 |
|     |        | R.N*ISSQEGSTDVVAR.T            | 2 | 65.49 |

---
